# Supplementary material for: Nox4 expression in osteo-progenitors controls bone development in mice during early life
Source: Springer Nature journal article supplement (doi:10.1038/s42003-022-03544-0), 2022-06-14
Supplement: MOESM2 [file 42003_2022_3544_MOESM2_ESM.pdf]

## **Supplementary Information**

### **Nox4 expression in osteo-progenitors controls bone development in mice during early life**

Supplementary Figure 1

Supplementary Figure 2

Supplementary Tables 1-9

Supplementary Results: bone marrow RNA sequencing

## Supplementary Figures

### Supplemental Fig. 1

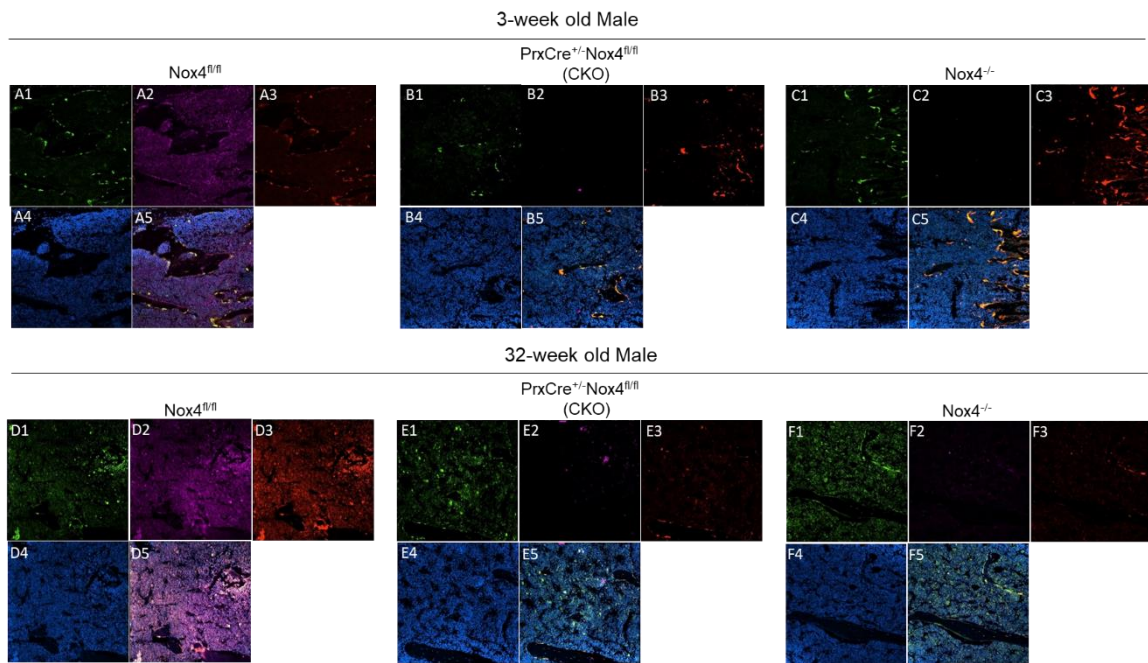

**Supplemental Fig. 1.** Co-immunostainings on 3-week old and 32-week old male femur histological sections for Prx1 (green, A1, B1, C1, D1, E1, F1) Nox4 (purple, A2, B2, C2, D2, E2, F2) and Cathepsin k (orange, A3, B3, C3, D3, E3, F3) for osteoblastic and osteoclastic. A4-F4, DAPI; A5-F5, color merged.

## Supplementary Fig. 2

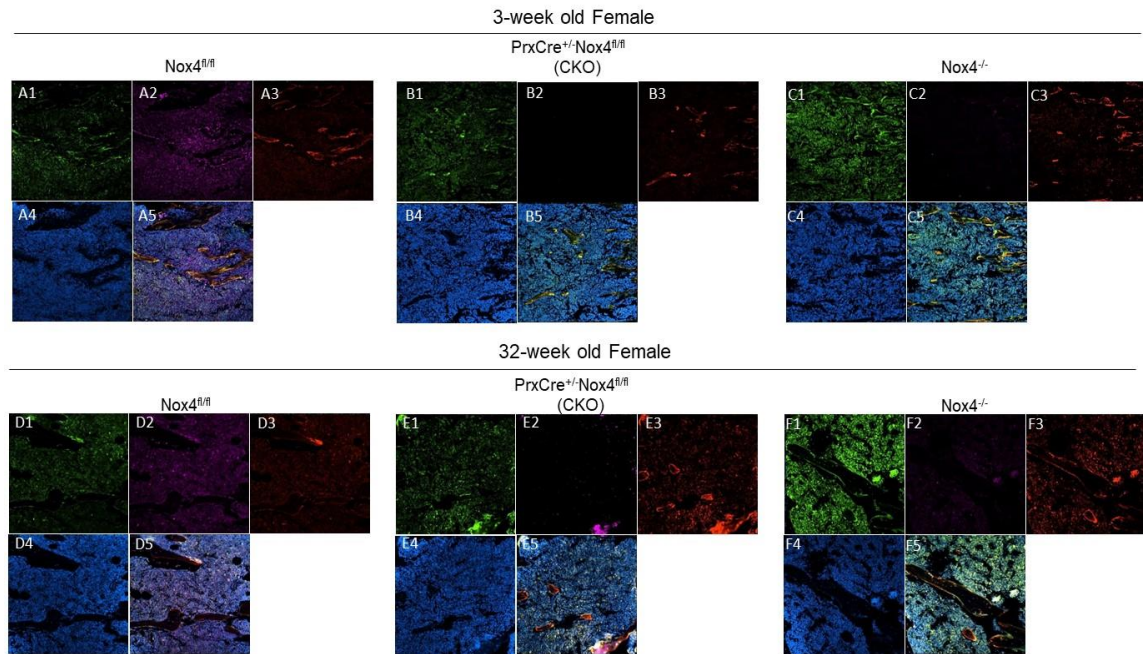

**Supplemental Fig. 2.** Co-immunostainings on 3-week old and 32-week old female femur histological sections for Prx1 (green, A1, B1, C1, D1, E1, F1) Nox4 (purple, A2, B2, C2, D2, E2, F2) and Cathepsin k (orange, A3, B3, C3, D3, E3, F3) for osteoblastic and osteoclastic. A4-F4, DAPI; A5-F5, color merged.

**Supplementary Table 1. Tibia bone micro-CT trabecular bone parameters in 32-week old male and female wild type and PrxCre<sup>+</sup>/-Nox4<sup>fl/fl</sup> (CKO) and Nox4<sup>-/-</sup> mice**

|                             |              |                 | Males        |                                             |              |                     |         |                       | Females               |              |                     |                       |       |       |
|-----------------------------|--------------|-----------------|--------------|---------------------------------------------|--------------|---------------------|---------|-----------------------|-----------------------|--------------|---------------------|-----------------------|-------|-------|
|                             |              |                 | Units        | Nox4 <sup>fl/fl</sup>                       |              | Nox4 <sup>-/-</sup> | P Value |                       | Nox4 <sup>fl/fl</sup> |              | Nox4 <sup>-/-</sup> | P Value               |       |       |
|                             |              |                 |              | PrxCre <sup>+/+</sup> Nox4 <sup>fl/fl</sup> | CKO          |                     | CKO     | Nox4 <sup>fl/fl</sup> | CKO                   | CKO          |                     | Nox4 <sup>fl/fl</sup> |       |       |
|                             | Abbreviation |                 |              |                                             |              |                     |         |                       |                       |              |                     |                       |       |       |
|                             |              |                 |              |                                             |              |                     |         |                       |                       |              |                     |                       |       |       |
| Tissue volume               | TV           | mm <sup>3</sup> | 2.73 ± 0.03  | 2.59 ± 0.13                                 | 2.54 ± 0.18  | 0.007               | 0.284   | 0.007                 | 2.46 ± 0.2            | 2.38 ± 0.2   | 2.11 ± 0.13         | 0.194                 | 0.022 | 0.004 |
| Bone volume                 | BV           | mm <sup>3</sup> | 0.15 ± 0.01  | 0.18 ± 0.04                                 | 0.17 ± 0.05  | 0.035               | 0.365   | 0.112                 | 0.06 ± 0.01           | 0.06 ± 0.01  | 0.05 ± 0.01         | 0.297                 | 0.114 | 0.048 |
| Percent bone volume         | BV/TV        | %               | 5.51 ± 0.39  | 6.49 ± 0.55                                 | 6.88 ± 1.77  | 0.001               | 0.294   | 0.034                 | 2.54 ± 0.52           | 2.5 ± 0.48   | 2.41 ± 0.65         | 0.437                 | 0.394 | 0.344 |
| Tissue surface              | TS           | mm <sup>2</sup> | 14.99 ± 0.16 | 14.43 ± 0.64                                | 14.42 ± 0.68 | 0.022               | 0.491   | 0.026                 | 13.86 ± 0.86          | 13.61 ± 0.78 | 12.77 ± 0.65        | 0.276                 | 0.051 | 0.021 |
| Bone surface                | BS           | mm <sup>2</sup> | 12.38 ± 0.8  | 13.25 ± 2.4                                 | 12.57 ± 2.08 | 0.190               | 0.290   | 0.414                 | 5.13 ± 1.02           | 5.01 ± 0.77  | 3.95 ± 0.99         | 0.403                 | 0.039 | 0.036 |
| Intersection surface        | i.S          | mm <sup>2</sup> | 0.6 ± 0.05   | 0.72 ± 0.14                                 | 0.76 ± 0.26  | 0.024               | 0.355   | 0.064                 | 0.31 ± 0.07           | 0.29 ± 0.07  | 0.25 ± 0.05         | 0.272                 | 0.225 | 0.097 |
| Bone surface / volume ratio | BS/BV        | 1/mm            | 82.54 ± 6.31 | 73.11 ± 4.17                                | 74.13 ± 9.94 | 0.003               | 0.403   | 0.042                 | 82.29 ± 7.18          | 85.18 ± 6.2  | 77.96 ± 4.66        | 0.201                 | 0.038 | 0.146 |
| Bone surface density        | BS/TV        | 1/mm            | 4.52 ± 0.26  | 5.06 ± 0.64                                 | 4.96 ± 0.74  | 0.031               | 0.390   | 0.086                 | 2.1 ± 0.48            | 2.11 ± 0.29  | 1.89 ± 0.58         | 0.470                 | 0.211 | 0.258 |
| Trabecular pattern factor   | Tb.Pf        | 1/mm            | 34.55 ± 3.83 | 30.69 ± 4.97                                | 30.47 ± 5.76 | 0.065               | 0.471   | 0.073                 | 34.9 ± 4.18           | 36.39 ± 3.72 | 33.48 ± 1.87        | 0.230                 | 0.092 | 0.268 |
| Centroid (x)                | Crd.X        | mm              | 1.97 ± 0.3   | 1.92 ± 0.26                                 | 1.75 ± 0.28  | 0.360               | 0.132   | 0.087                 | 1.96 ± 0.17           | 1.98 ± 0.14  | 1.86 ± 0.18         | 0.416                 | 0.120 | 0.160 |
| Centroid (y)                | Crd.Y        | mm              | 1.73 ± 0.17  | 1.67 ± 0.17                                 | 1.71 ± 0.34  | 0.271               | 0.384   | 0.464                 | 1.67 ± 0.25           | 1.76 ± 0.26  | 1.96 ± 0.12         | 0.238                 | 0.088 | 0.023 |
| Centroid (z)                | Crd.Z        | mm              | 17.72 ± 0.43 | 17.65 ± 1.32                                | 17.18 ± 1.43 | 0.448               | 0.270   | 0.182                 | 17.54 ± 1.01          | 17.15 ± 0.66 | 17.71 ± 0.98        | 0.192                 | 0.142 | 0.392 |
| Structure model index       | SMI          |                 | 2.5 ± 0.11   | 2.51 ± 0.3                                  | 2.45 ± 0.22  | 0.495               | 0.358   | 0.294                 | 2.54 ± 0.14           | 2.56 ± 0.12  | 2.58 ± 0.18         | 0.376                 | 0.409 | 0.322 |
| Trabecular thickness        | Tb.Th        | mm              | 0.05 ± 0     | 0.05 ± 0                                    | 0.05 ± 0.01  | 0.001               | 0.327   | 0.025                 | 0.05 ± 0              | 0.05 ± 0     | 0.05 ± 0.01         | 0.322                 | 0.096 | 0.088 |
| Trabecular number           | Tb.N         | 1/mm            | 1.16 ± 0.04  | 1.21 ± 0.16                                 | 1.29 ± 0.25  | 0.205               | 0.228   | 0.085                 | 0.52 ± 0.12           | 0.52 ± 0.1   | 0.47 ± 0.17         | 0.489                 | 0.290 | 0.279 |
| Trabecular separation       | Tb.Sp        | mm              | 0.28 ± 0.02  | 0.27 ± 0.01                                 | 0.28 ± 0.02  | 0.071               | 0.247   | 0.261                 | 0.42 ± 0.06           | 0.41 ± 0.02  | 0.43 ± 0.04         | 0.322                 | 0.129 | 0.377 |
| Degree of anisotropy        | DA           |                 | 2.32 ± 0.07  | 2.47 ± 0.2                                  | 2.47 ± 0.12  | 0.036               | 0.416   | 0.165                 | 2.38 ± 0.39           | 2.29 ± 0.29  | 2.23 ± 0.13         | 0.136                 | 0.213 | 0.236 |
| Eigenvalue 1                |              |                 | 4.37 ± 1.37  | 3.85 ± 0.77                                 | 3.49 ± 1.44  | 0.202               | 0.286   | 0.134                 | 4.58 ± 1.19           | 4.96 ± 1.28  | 2.7 ± 0.55          | 0.273                 | 0.005 | 0.006 |
| Eigenvalue 2                |              |                 | 8.38 ± 2.55  | 7.48 ± 1.72                                 | 6.49 ± 2.84  | 0.228               | 0.221   | 0.107                 | 7.37 ± 1.87           | 7.71 ± 2.61  | 4.44 ± 0.85         | 0.378                 | 0.020 | 0.006 |
| Eigenvalue 3                |              |                 | 10.18 ± 3.27 | 9.5 ± 1.77                                  | 8.58 ± 3.52  | 0.319               | 0.273   | 0.198                 | 10.56 ± 1.8           | 11.15 ± 2.35 | 6.24 ± 0.87         | 0.284                 | 0.002 | 0.000 |

Supplemental Table 1. Micro-CT trabecular bone parameters of tibia of 32-week old male and female Nox4<sup>fl/fl</sup> control, and PrxCre<sup>+/+</sup>Nox4<sup>fl/fl</sup> CKO and Nox4<sup>-/-</sup> mice. There were 6-9 mice per group. Data was expressed as mean ± SD, p value was analyzed by 1-way ANOVA with posthoc tests, CKO versus f/f control or Nox4<sup>-/-</sup>.

**Supplementary Table 2. Femur bone micro-CT cortical bone parameters in 3-week old male and female wild type and PrxCre<sup>+</sup>/Nox4<sup>fl/fl</sup> (CKO) and Nox4<sup>-/-</sup> mice**

|                                                          | Abbreviation | Units           | Males                                      |             |             |                       |       |       | Females                                    |             |            |                       |       |       |
|----------------------------------------------------------|--------------|-----------------|--------------------------------------------|-------------|-------------|-----------------------|-------|-------|--------------------------------------------|-------------|------------|-----------------------|-------|-------|
|                                                          |              |                 | PrxCre <sup>+</sup> /Nox4 <sup>fl/fl</sup> |             |             | Nox4 <sup>fl/fl</sup> |       |       | PrxCre <sup>+</sup> /Nox4 <sup>fl/fl</sup> |             |            | Nox4 <sup>fl/fl</sup> |       |       |
|                                                          |              |                 | CKO                                        | vs          | CKO         | CKO                   | vs    | CKO   | CKO                                        | vs          | CKO        | CKO                   | vs    | CKO   |
| Tissue volume                                            | TV           | mm <sup>3</sup> | 1.39±0.15                                  | 1.24±0.07   | 1.36±0.07   | 0.028                 | 0.015 | 0.329 | 1.3±0.2                                    | 1.1±0.08    | 1.3±0.1    | 0.007                 | 0.036 | 0.173 |
| Bone volume                                              | BV           | mm <sup>3</sup> | 0.34±0.05                                  | 0.29±0.02   | 0.33±0.03   | 0.030                 | 0.020 | 0.303 | 0.32±0.05                                  | 0.25±0.02   | 0.35±0.04  | 0.011                 | 0.000 | 0.120 |
| Percent bone volume                                      | BV/TV        | %               | 24.6±1.1                                   | 23.5±1.0    | 23.0±0.5    | 0.050                 | 0.188 | 0.006 | 24.8±1.8                                   | 22.7±1.2    | 23.6±1.3   | 0.024                 | 0.123 | 0.094 |
| Tissue surface                                           | TS           | mm <sup>2</sup> | 8.0±0.6                                    | 7.5±0.8     | 7.5±0.4     | 0.158                 | 0.428 | 0.071 | 8.2±1.5                                    | 6.97±1.0    | 7.7±0.4    | 0.067                 | 0.044 | 0.217 |
| Peripheral tissue surface                                | TS(per)      | mm <sup>2</sup> | 4.5±0.23                                   | 4.3±0.13    | 4.6±0.2     | 0.027                 | 0.012 | 0.300 | 4.66±0.5                                   | 4.1±0.2     | 4.6±0.3    | 0.020                 | 0.002 | 0.412 |
| Bone surface                                             | BS           | mm <sup>2</sup> | 10.0±0.7                                   | 9.3±0.4     | 9.9±0.4     | 0.040                 | 0.029 | 0.421 | 9.6±0.6                                    | 8.7±0.4     | 9.8±0.5    | 0.009                 | 0.001 | 0.220 |
| Peripheral bone surface                                  | BS(per)      | mm <sup>2</sup> | 8.5±0.5                                    | 8.0±0.29    | 8.4±0.24    | 0.036                 | 0.020 | 0.380 | 8.2±0.5                                    | 7.6±0.3     | 8.4±0.4    | 0.013                 | 0.001 | 0.253 |
| Bone surface / volume ratio                              | BS/BV        | 1/mm            | 29.7±2.7                                   | 32.1±1.3    | 30.2±1.4    | 0.047                 | 0.027 | 0.342 | 30.6±3.7                                   | 34.5±2.0    | 28.4±2.2   | 0.028                 | 0.000 | 0.100 |
| Mean total crosssectional tissue area                    | T.Ar         | mm <sup>2</sup> | 1.4±0.1                                    | 1.2±0.07    | 1.3±0.07    | 0.028                 | 0.015 | 0.329 | 1.3±0.16                                   | 1.1±0.08    | 1.3±0.1    | 0.007                 | 0.005 | 0.442 |
| Mean total crosssectional tissue perimeter               | T.Pm         | mm              | 4.5±0.2                                    | 4.2±0.1     | 4.6±0.23    | 0.027                 | 0.012 | 0.300 | 4.5±0.3                                    | 4.0±0.2     | 4.5±0.3    | 0.007                 | 0.002 | 0.324 |
| Mean total crosssectional bone area                      | B.Ar         | mm <sup>2</sup> | 0.3±0.05                                   | 0.29±0.02   | 0.32±0.03   | 0.030                 | 0.020 | 0.303 | 0.32±0.05                                  | 0.25±0.02   | 0.34±0.04  | 0.011                 | 0.000 | 0.120 |
| Mean total crosssectional bone perimeter                 | B.Pm         | mm              | 8.4±0.5                                    | 7.9±0.28    | 8.3±0.24    | 0.036                 | 0.020 | 0.380 | 8.15±0.5                                   | 7.5±0.3     | 8.3±0.4    | 0.013                 | 0.001 | 0.253 |
| Average object area per slice                            | Av.Obj.Ar    | mm <sup>2</sup> | 0.33±0.05                                  | 0.29±0.02   | 0.32±0.03   | 0.030                 | 0.020 | 0.303 | 0.32±0.05                                  | 0.25±0.02   | 0.34±0.04  | 0.011                 | 0.000 | 0.120 |
| Average object area-equivalent circle diameter per slice | Av.Obj.ECda  | mm              | 0.65±0.05                                  | 0.60±0.02   | 0.64±0.03   | 0.032                 | 0.020 | 0.317 | 0.63±0.05                                  | 0.56±0.03   | 0.66±0.04  | 0.011                 | 0.000 | 0.119 |
| Average moment of inertia (x)                            | Av.MMI(x)    | mm <sup>4</sup> | 0.055±0.01                                 | 0.041±0.004 | 0.054±0.01  | 0.013                 | 0.013 | 0.415 | 0.048±0.01                                 | 0.033±0.004 | 0.055±0.01 | 0.013                 | 0.000 | 0.091 |
| Average moment of inertia (y)                            | Av.MMI(y)    | mm <sup>4</sup> | 0.076±0.02                                 | 0.058±0.007 | 0.07±0.01   | 0.045                 | 0.030 | 0.295 | 0.07±0.02                                  | 0.045±0.008 | 0.076±0.02 | 0.005                 | 0.002 | 0.240 |
| Mean polar moment of inertia                             | MMI(polar)   | mm <sup>4</sup> | 0.13±0.03                                  | 0.09±0.01   | 0.12±0.02   | 0.027                 | 0.011 | 0.331 | 0.12±0.03                                  | 0.078±0.01  | 0.13±0.03  | 0.007                 | 0.001 | 0.163 |
| Average principal moment of inertia (max)                | Av.MMI(max)  | mm <sup>4</sup> | 0.078±0.02                                 | 0.058±0.007 | 0.074±0.01  | 0.037                 | 0.015 | 0.357 | 0.07±0.02                                  | 0.046±0.008 | 0.079±0.02 | 0.005                 | 0.001 | 0.202 |
| Average principal moment of inertia (min)                | Av.MMI(min)  | mm <sup>4</sup> | 0.053±0.01                                 | 0.040±0.004 | 0.050±0.006 | 0.017                 | 0.011 | 0.288 | 0.046±0.01                                 | 0.033±0.004 | 0.053±0.01 | 0.014                 | 0.001 | 0.120 |
| Mean eccentricity                                        | Ecc          | %               | 0.55±0.06                                  | 0.55±0.05   | 0.56±0.04   | 0.472                 | 0.321 | 0.292 | 0.59±0.04                                  | 0.52±0.05   | 0.56±0.04  | 0.012                 | 0.056 | 0.154 |
| Crosssectional thickness                                 | Cs.Th        | mm              | 0.08±0.008                                 | 0.07±0.003  | 0.077±0.005 | 0.039                 | 0.049 | 0.293 | 0.077±0.009                                | 0.07±0.005  | 0.08±0.007 | 0.021                 | 0.001 | 0.105 |
| Trabecular thickness (plate model)                       | Tb.Th(pl)    | mm              | 0.068±0.006                                | 0.062±0.002 | 0.066±0.003 | 0.039                 | 0.046 | 0.254 | 0.066±0.008                                | 0.058±0.003 | 0.07±0.006 | 0.025                 | 0.001 | 0.104 |
| Trabecular separation (plate model)                      | Tb.Sp(pl)    | mm              | 0.21±0.007                                 | 0.20±0.005  | 0.21±0.007  | 0.038                 | 0.114 | 0.319 | 0.2±0.02                                   | 0.2±0.006   | 0.2±0.02   | 0.466                 | 0.286 | 0.281 |
| Trabecular number (plate model)                          | Tb.N(pl)     | 1/mm            | 3.6±0.15                                   | 3.7±0.06    | 3.6±0.1     | 0.018                 | 0.030 | 0.262 | 3.7±0.22                                   | 3.9±0.1     | 3.6±0.3    | 0.022                 | 0.054 | 0.477 |
| Trabecular diameter (rod model)                          | Tb.Dm(rd)    | mm              | 0.14±0.01                                  | 0.12±0.005  | 0.13±0.007  | 0.039                 | 0.046 | 0.254 | 0.13±0.02                                  | 0.12±0.007  | 0.14±0.01  | 0.025                 | 0.001 | 0.104 |
| Trabecular separation (rod model)                        | Tb.Sp(rd)    | mm              | 0.11±0.004                                 | 0.10±0.002  | 0.10±0.003  | 0.023                 | 0.053 | 0.278 | 0.1±0.006                                  | 0.1±0.003   | 0.1±0.009  | 0.177                 | 0.118 | 0.273 |
| Trabecular number (rod model)                            | Tb.N(rd)     | 1/mm            | 4.1±0.26                                   | 4.4±0.1     | 4.2±0.1     | 0.029                 | 0.019 | 0.271 | 4.1±0.5                                    | 4.6±0.2     | 4.0±0.3    | 0.024                 | 0.001 | 0.375 |
| Closed porosity (percent)                                | Po(cl)       | %               | 75.4±1.1                                   | 76.3±1.2    | 74.8±2.4    | 0.101                 | 0.120 | 0.290 | 74.7±3.5                                   | 76.9±1.3    | 72.5±4.6   | 0.098                 | 0.034 | 0.164 |
| Centroid (x)                                             | Crd.X        | mm              | 1.4±0.12                                   | 1.2±0.2     | 1.2±0.3     | 0.163                 | 0.492 | 0.179 | 1.3±0.2                                    | 1.2±0.1     | 1.1±0.1    | 0.083                 | 0.400 | 0.080 |
| Centroid (y)                                             | Crd.Y        | mm              | 1.21±0.13                                  | 1.27±0.15   | 1.15±0.2    | 0.216                 | 0.162 | 0.288 | 1.15±0.2                                   | 1.1±0.1     | 1.1±0.1    | 0.287                 | 0.148 | 0.344 |
| Centroid (z)                                             | Crd.Z        | mm              | 7.25±0.04                                  | 7.6±0.6     | 7.45±0.3    | 0.103                 | 0.312 | 0.164 | 7.3±0.5                                    | 6.9±0.5     | 7.3±0.6    | 0.112                 | 0.114 | 0.394 |
| Mean fractal dimension                                   | FD           |                 | 1.17±0.04                                  | 1.16±0.02   | 1.18±0.04   | 0.434                 | 0.221 | 0.319 | 1.2±0.02                                   | 1.2±0.02    | 1.1±0.02   | 0.324                 | 0.048 | 0.083 |
| Total intersection surface                               | i.S          | mm <sup>2</sup> | 4.52±0.23                                  | 4.3±0.13    | 4.5±0.2     | 0.029                 | 0.011 | 0.401 | 4.8±0.9                                    | 4.0±0.2     | 4.6±0.3    | 0.045                 | 0.002 | 0.308 |

Supplemental Table 2. Micro-CT cortical bone parameters of femur of 3-week old male and female Nox4<sup>fl/fl</sup> control, and PrxCre<sup>+</sup>/Nox4<sup>fl/fl</sup> CKO and Nox4<sup>-/-</sup> mice. There were 6-9 mice per group. Data was expressed as mean ± SD, p value was analyzed by 1-way ANOVA with posthoc tests, CKO versus f/f control or Nox4<sup>-/-</sup>.

**Supplemental Table 3. Femur bone micro-CT cortical bone parameters in 32-week old male and female wild type and PrxCre<sup>+</sup>/Nox4<sup>fl/fl</sup> (CKO) and Nox4<sup>-/-</sup> mice**

|                                                          | Abbreviation | Units           | Males                 |            |                     | Females               |       |                     | PrxCre <sup>+</sup> /Nox4 <sup>fl/fl</sup> | CKO         | Nox4 <sup>fl/fl</sup> | CKO   | Nox4 <sup>fl/fl</sup> | CKO   | Nox4 <sup>fl/fl</sup> |
|----------------------------------------------------------|--------------|-----------------|-----------------------|------------|---------------------|-----------------------|-------|---------------------|--------------------------------------------|-------------|-----------------------|-------|-----------------------|-------|-----------------------|
|                                                          |              |                 | Nox4 <sup>fl/fl</sup> | CKO        | Nox4 <sup>-/-</sup> | Nox4 <sup>fl/fl</sup> | CKO   | Nox4 <sup>-/-</sup> |                                            |             |                       |       |                       |       |                       |
|                                                          |              |                 |                       |            |                     |                       |       |                     |                                            |             |                       |       |                       |       |                       |
| Tissue volume                                            | TV           | mm <sup>3</sup> | 2.1±0.2               | 2.1±0.1    | 2.0±0.3             | 0.410                 | 0.330 | 0.261               | 1.7±0.2                                    | 1.6±0.1     | 1.6±0.1               | 0.132 | 0.232                 | 0.294 |                       |
| Bone volume                                              | BV           | mm <sup>3</sup> | 0.95±0.05             | 0.96±0.07  | 0.95±0.06           | 0.365                 | 0.401 | 0.469               | 0.9±0.09                                   | 0.8±0.08    | 0.9±0.05              | 0.285 | 0.222                 | 0.447 |                       |
| Percent bone volume                                      | BV/TV        | %               | 44.7±2.8              | 45.6±1.1   | 46.7±2.7            | 0.260                 | 0.216 | 0.097               | 53.0±2.4                                   | 54.5±2.5    | 54.6±1.6              | 0.118 | 0.454                 | 0.078 |                       |
| Tissue surface                                           | TS           | mm <sup>2</sup> | 10.7±0.8              | 11.0±0.9   | 10.6±0.9            | 0.253                 | 0.214 | 0.413               | 9.4±1.3                                    | 8.8±0.5     | 9.4±0.9               | 0.115 | 0.054                 | 0.498 |                       |
| Peripheral tissue surface                                | TS(per)      | mm <sup>2</sup> | 5.9±0.25              | 6.2±0.5    | 5.9±0.3             | 0.103                 | 0.165 | 0.410               | 5.3±0.5                                    | 5.1±0.2     | 5.5±0.5               | 0.118 | 0.030                 | 0.241 |                       |
| Bone surface                                             | BS           | mm <sup>2</sup> | 14.4±0.9              | 15.4±1.6   | 14.5±1.6            | 0.100                 | 0.178 | 0.482               | 11.8±1.0                                   | 11.4±0.8    | 11.8±0.7              | 0.185 | 0.199                 | 0.448 |                       |
| Peripheral bone surface                                  | BS(per)      | mm <sup>2</sup> | 11.0±0.6              | 11.6±1.1   | 11.1±1.1            | 0.122                 | 0.209 | 0.475               | 9.0±0.7                                    | 8.7±0.5     | 9.0±0.5               | 0.136 | 0.139                 | 0.445 |                       |
| Bone surface / volume ratio                              | BS/BV        | 1/mm            | 15.2±0.6              | 16.0±0.8   | 15.1±0.7            | 0.038                 | 0.047 | 0.447               | 12.9±0.4                                   | 12.7±0.5    | 12.7±0.5              | 0.300 | 0.465                 | 0.274 |                       |
| Mean total cross-sectional tissue area                   | T.Ar         | mm <sup>2</sup> | 2.1±0.2               | 2.0±0.1    | 2.0±0.3             | 0.410                 | 0.330 | 0.261               | 1.7±0.2                                    | 1.6±0.1     | 1.6±0.1               | 0.132 | 0.232                 | 0.294 |                       |
| Mean total cross-sectional tissue perimeter              | T.Pm         | mm              | 5.8±0.3               | 6.1±0.5    | 5.9±0.3             | 0.103                 | 0.165 | 0.410               | 5.2±0.5                                    | 5.0±0.2     | 5.4±0.5               | 0.118 | 0.030                 | 0.241 |                       |
| Mean total cross-sectional bone area                     | B.Ar         | mm <sup>2</sup> | 0.9±0.05              | 0.9±0.07   | 0.9±0.06            | 0.365                 | 0.401 | 0.469               | 0.9±0.09                                   | 0.8±0.08    | 0.9±0.05              | 0.285 | 0.222                 | 0.447 |                       |
| Mean total cross-sectional bone perimeter                | B.Pm         | mm              | 10.9±0.6              | 11.5±1.1   | 11.0±1.1            | 0.122                 | 0.209 | 0.475               | 8.9±0.7                                    | 8.6±0.5     | 8.9±0.5               | 0.136 | 0.139                 | 0.445 |                       |
| Average object area per slice                            | Av.Obj.Ar    | mm <sup>2</sup> | 0.9±0.05              | 0.9±0.07   | 0.9±0.06            | 0.365                 | 0.401 | 0.469               | 0.9±0.09                                   | 0.8±0.08    | 0.9±0.05              | 0.285 | 0.222                 | 0.447 |                       |
| Average object area-equivalent circle diameter per slice | Av.Obj.ECDA  | mm              | 1.0±0.03              | 1.1±0.04   | 1.0±0.04            | 0.370                 | 0.402 | 0.473               | 1.0±0.05                                   | 1.0±0.05    | 1.0±0.03              | 0.285 | 0.212                 | 0.436 |                       |
| Average moment of inertia (x)                            | Av.MMI(x)    | mm <sup>4</sup> | 0.15±0.03             | 0.13±0.02  | 0.14±0.03           | 0.175                 | 0.222 | 0.398               | 0.12±0.02                                  | 0.11±0.01   | 0.11±0.01             | 0.067 | 0.154                 | 0.236 |                       |
| Average moment of inertia (y)                            | Av.MMI(y)    | mm <sup>4</sup> | 0.4±0.06              | 0.4±0.07   | 0.4±0.09            | 0.322                 | 0.411 | 0.430               | 0.29±0.09                                  | 0.26±0.06   | 0.29±0.05             | 0.204 | 0.134                 | 0.495 |                       |
| Mean polar moment of inertia                             | MMI(polar)   | mm <sup>4</sup> | 0.56±0.09             | 0.56±0.08  | 0.56±0.1            | 0.488                 | 0.494 | 0.481               | 0.42±0.1                                   | 0.37±0.07   | 0.41±0.06             | 0.149 | 0.132                 | 0.444 |                       |
| Average principal moment of inertia (max)                | Av.MMI(max)  | mm <sup>4</sup> | 0.41±0.06             | 0.42±0.07  | 0.44±0.08           | 0.379                 | 0.412 | 0.280               | 0.30±0.08                                  | 0.27±0.06   | 0.31±0.05             | 0.152 | 0.086                 | 0.462 |                       |
| Average principal moment of inertia (min)                | Av.MMI(min)  | mm <sup>4</sup> | 0.14±0.04             | 0.13±0.02  | 0.12±0.03           | 0.298                 | 0.256 | 0.143               | 0.11±0.02                                  | 0.10±0.02   | 0.10±0.01             | 0.155 | 0.453                 | 0.125 |                       |
| Mean eccentricity                                        | Ecc          |                 | 0.8±0.04              | 0.8±0.02   | 0.8±0.02            | 0.217                 | 0.053 | 0.021               | 0.78±0.03                                  | 0.77±0.03   | 0.8±0.03              | 0.287 | 0.016                 | 0.054 |                       |
| Cross-sectional thickness                                | Cs.Th        | mm              | 0.17±0.006            | 0.16±0.006 | 0.17±0.007          | 0.045                 | 0.058 | 0.447               | 0.2±0.008                                  | 0.2±0.01    | 0.2±0.01              | 0.272 | 0.477                 | 0.293 |                       |
| Trabecular thickness (plate model)                       | Tb.Th(pl)    | mm              | 0.13±0.006            | 0.12±0.006 | 0.13±0.006          | 0.040                 | 0.046 | 0.439               | 0.15±0.005                                 | 0.15±0.006  | 0.15±0.01             | 0.287 | 0.464                 | 0.255 |                       |
| Trabecular separation (plate model)                      | Tb.Sp(pl)    | mm              | 0.16±0.02             | 0.14±0.01  | 0.15±0.01           | 0.103                 | 0.429 | 0.085               | 0.13±0.01                                  | 0.13±0.008  | 0.13±0.01             | 0.078 | 0.442                 | 0.053 |                       |
| Trabecular number (plate model)                          | Tb.N(pl)     | 1/mm            | 3.4±0.3               | 3.6±0.3    | 3.5±0.1             | 0.065                 | 0.166 | 0.131               | 3.4±0.09                                   | 3.4±0.06    | 3.4±0.09              | 0.070 | 0.460                 | 0.090 |                       |
| Trabecular diameter (rod model)                          | Tb.Dm(rd)    | mm              | 0.26±0.01             | 0.25±0.01  | 0.26±0.01           | 0.040                 | 0.046 | 0.439               | 0.31±0.01                                  | 0.31±0.01   | 0.31±0.01             | 0.287 | 0.464                 | 0.255 |                       |
| Trabecular separation (rod model)                        | Tb.Sp(rd)    | mm              | 0.08±0.01             | 0.07±0.008 | 0.07±0.007          | 0.113                 | 0.493 | 0.082               | 0.067±0.007                                | 0.062±0.006 | 0.062±0.004           | 0.087 | 0.450                 | 0.057 |                       |
| Trabecular number (rod model)                            | Tb.N(rd)     | 1/mm            | 2.8±0.2               | 3.0±0.2    | 2.9±0.09            | 0.043                 | 0.069 | 0.233               | 2.6±0.06                                   | 2.6±0.06    | 2.6±0.08              | 0.342 | 0.492                 | 0.384 |                       |
| Closed porosity (percent)                                | Po(d)        | %               | 55.1±2.8              | 53.9±0.7   | 53.1±2.7            | 0.192                 | 0.270 | 0.095               | 46.6±2.4                                   | 45.3±2.6    | 45.1±1.6              | 0.143 | 0.421                 | 0.081 |                       |
| Centroid (x)                                             | Crd.X        | mm              | 1.7±0.1               | 1.6±0.09   | 1.6±0.1             | 0.175                 | 0.487 | 0.173               | 1.5±0.2                                    | 1.4±0.1     | 1.5±0.1               | 0.030 | 0.010                 | 0.435 |                       |
| Centroid (y)                                             | Crd.Y        | mm              | 1.4±0.2               | 1.3±0.09   | 1.3±0.2             | 0.183                 | 0.237 | 0.438               | 1.2±0.07                                   | 1.2±0.09    | 1.3±0.1               | 0.283 | 0.190                 | 0.260 |                       |
| Centroid (z)                                             | Crd.Z        | mm              | 13.1±0.7              | 13.0±0.5   | 13.6±0.5            | 0.436                 | 0.034 | 0.047               | 13.0±0.6                                   | 12.6±0.8    | 13.1±0.6              | 0.121 | 0.133                 | 0.460 |                       |
| Mean fractal dimension                                   | FD           |                 | 1.2±0.02              | 1.2±0.02   | 1.2±0.01            | 0.147                 | 0.230 | 0.304               | 1.2±0.02                                   | 1.2±0.02    | 1.2±0.02              | 0.014 | 0.009                 | 0.204 |                       |
| Total intersection surface                               | I.S          | mm <sup>2</sup> | 5.9±0.3               | 5.9±0.3    | 5.9±0.3             | 0.432                 | 0.494 | 0.428               | 5.3±0.4                                    | 5.1±0.2     | 5.3±0.3               | 0.135 | 0.066                 | 0.455 |                       |

Supplemental Table 3. Micro-CT cortical bone parameters of femur of 32-week old male and female Nox4<sup>fl/fl</sup> control, PrxCre<sup>+</sup>/Nox4<sup>fl/fl</sup> CKO and Nox4<sup>-/-</sup> mice. There were 6 – 9 mice per group. Data was expressed as mean ± SD, p value was analyzed by 1-way ANOVA with posthoc tests, CKO versus f/f control or Nox4<sup>-/-</sup>.

**Supplemental Table 4. Femur bone micro-CT trabecular bone parameters in 6-week old male and female wild type and PrxCre<sup>+</sup>/Nox4<sup>fl/fl</sup> (CKO) and Nox4<sup>-/-</sup> mice**

| Parameters                  | Abbreviation | Units             | Males                                       |            |                       |       |                     |                       | Females               |                                             |                     |                       |       |                     |                       |
|-----------------------------|--------------|-------------------|---------------------------------------------|------------|-----------------------|-------|---------------------|-----------------------|-----------------------|---------------------------------------------|---------------------|-----------------------|-------|---------------------|-----------------------|
|                             |              |                   | PrxCre <sup>+/+</sup> Nox4 <sup>fl/fl</sup> |            | Nox4 <sup>fl/fl</sup> |       | CKO                 | Nox4 <sup>fl/fl</sup> |                       | PrxCre <sup>+/+</sup> Nox4 <sup>fl/fl</sup> |                     | Nox4 <sup>fl/fl</sup> |       | CKO                 | Nox4 <sup>fl/fl</sup> |
|                             |              |                   | vs                                          | vs         | vs                    | vs    | vs                  | vs                    | vs                    | vs                                          | vs                  | vs                    | vs    |                     |                       |
|                             |              |                   | Nox4 <sup>fl/fl</sup>                       | CKO        | Nox4 <sup>-/-</sup>   | CKO   | Nox4 <sup>-/-</sup> | Nox4 <sup>fl/fl</sup> | Nox4 <sup>fl/fl</sup> | CKO                                         | Nox4 <sup>-/-</sup> | Nox4 <sup>fl/fl</sup> | CKO   | Nox4 <sup>-/-</sup> |                       |
| Tissue volume               | TV           | mm <sup>3</sup>   | 4.18±0.48                                   | 4.09±0.29  | 4.4±0.38              | 0.315 | 0.054               | 0.203                 | 3.53±0.18             | 3.58±0.21                                   | 3.97±0.34           | 0.327                 | 0.020 | 0.010               |                       |
| Bone volume                 | BV           | mm <sup>3</sup>   | 0.44±0.09                                   | 0.39±0.03  | 0.5±0.04              | 0.079 | 0.000               | 0.102                 | 0.26±0.03             | 0.25±0.03                                   | 0.33±0.09           | 0.194                 | 0.030 | 0.060               |                       |
| Percent bone volume         | BV/TV        | %                 | 10.5±1.43                                   | 9.64±0.8   | 11.5±1.12             | 0.072 | 0.002               | 0.104                 | 7.49±0.78             | 6.94±0.58                                   | 8.14±1.58           | 0.081                 | 0.048 | 0.188               |                       |
| Tissue surface              | TS           | mm <sup>2</sup>   | 17.96±1.39                                  | 17.59±0.78 | 18.77±0.39            | 0.250 | 0.004               | 0.116                 | 15.86±0.59            | 15.83±0.68                                  | 17.07±1.02          | 0.468                 | 0.018 | 0.016               |                       |
| Bone surface                | BS           | mm <sup>2</sup>   | 39.25±7.49                                  | 35.9±2.6   | 43.51±3.79            | 0.113 | 0.000               | 0.134                 | 24.89±2.72            | 23.56±2.43                                  | 29.77±6.64          | 0.176                 | 0.024 | 0.056               |                       |
| Intersection surface        | i.S          | mm <sup>2</sup>   | 1.28±0.28                                   | 1.14±0.15  | 1.44±0.22             | 0.100 | 0.005               | 0.157                 | 0.82±0.07             | 0.78±0.1                                    | 0.99±0.32           | 0.216                 | 0.070 | 0.100               |                       |
| Bone surface / volume ratio | BS/BV        | 1/mm              | 89.21±3.91                                  | 91.37±2.16 | 86.33±3.55            | 0.086 | 0.003               | 0.104                 | 94.26±1.99            | 94.92±3.39                                  | 92.13±4.61          | 0.332                 | 0.138 | 0.153               |                       |
| Bone surface density        | BS/TV        | 1/mm              | 9.32±1.01                                   | 8.8±0.61   | 9.9±0.61              | 0.105 | 0.004               | 0.138                 | 7.05±0.66             | 6.58±0.37                                   | 7.45±1.1            | 0.061                 | 0.039 | 0.235               |                       |
| Trabecular pattern factor   | Tb.Pf        | 1/mm              | 30.77±2.41                                  | 32.4±1.53  | 29.39±2.15            | 0.056 | 0.005               | 0.159                 | 33.18±1.76            | 33.9±2                                      | 32.64±3.89          | 0.245                 | 0.244 | 0.376               |                       |
| Centroid (x)                | Crđ.X        | mm                | 1.28±0.15                                   | 1.27±0.13  | 1.22±0.24             | 0.439 | 0.311               | 0.293                 | 1.16±0.06             | 1.23±0.09                                   | 1.23±0.12           | 0.058                 | 0.495 | 0.105               |                       |
| Centroid (y)                | Crđ.Y        | mm                | 1.57±0.15                                   | 1.65±0.1   | 1.63±0.22             | 0.115 | 0.390               | 0.309                 | 1.46±0.09             | 1.61±0.16                                   | 1.47±0.22           | 0.028                 | 0.129 | 0.450               |                       |
| Centroid (z)                | Crđ.Z        | mm                | 10.23±1.02                                  | 10.17±1.24 | 9.24±2.02             | 0.459 | 0.150               | 0.130                 | 9.94±1.6              | 9.47±1.35                                   | 10.24±1.7           | 0.283                 | 0.213 | 0.387               |                       |
| Structure model index       | SMI          |                   | 2.07±0.08                                   | 2.13±0.06  | 2.04±0.07             | 0.049 | 0.019               | 0.278                 | 2.11±0.07             | 2.14±0.06                                   | 2.12±0.15           | 0.208                 | 0.370 | 0.447               |                       |
| Trabecular thickness        | Tb.Th        | mm                | 0.04±0                                      | 0.04±0     | 0.04±0                | 0.215 | 0.005               | 0.044                 | 0.04±0                | 0.04±0                                      | 0.04±0              | 0.437                 | 0.192 | 0.067               |                       |
| Trabecular number           | Tb.N         | 1/mm              | 2.55±0.3                                    | 2.38±0.19  | 2.71±0.21             | 0.082 | 0.005               | 0.171                 | 1.9±0.2               | 1.76±0.11                                   | 2.03±0.35           | 0.060                 | 0.043 | 0.236               |                       |
| Trabecular separation       | Tb.Sp        | mm                | 0.21±0.02                                   | 0.21±0.01  | 0.2±0.01              | 0.298 | 0.004               | 0.084                 | 0.26±0.03             | 0.27±0.02                                   | 0.24±0.01           | 0.217                 | 0.022 | 0.187               |                       |
| Eigenvalue 1                |              |                   | 1.55±0.52                                   | 1.59±0.35  | 1.76±0.41             | 0.435 | 0.215               | 0.236                 | 1.24±0.16             | 1.32±0.2                                    | 1.5±0.11            | 0.229                 | 0.067 | 0.011               |                       |
| Eigenvalue 2                |              |                   | 3.65±1.31                                   | 3.44±0.7   | 3.85±0.8              | 0.343 | 0.172               | 0.384                 | 2.67±0.28             | 2.74±0.34                                   | 3.19±0.3            | 0.334                 | 0.027 | 0.008               |                       |
| Eigenvalue 3                |              |                   | 3.86±1.41                                   | 3.76±0.71  | 4.03±0.8              | 0.426 | 0.263               | 0.406                 | 2.88±0.32             | 3.01±0.36                                   | 3.44±0.3            | 0.253                 | 0.037 | 0.009               |                       |
| BMD                         |              | g/cm <sup>3</sup> | 0.14±0.05                                   | 0.13±0.05  | 0.12±0.03             | 0.359 | 0.121               | 0.318                 | 0.13±0.05             | 0.14±0.04                                   | 0.13±0.02           | 0.352                 | 0.339 | 0.491               |                       |

Supplemental Table 4. Micro-CT trabecular bone parameters of femur of 6-week old male and female Nox4<sup>fl/fl</sup> control, and PrxCre<sup>+</sup>Nox4<sup>fl/fl</sup> CKO and Nox4<sup>-/-</sup> mice. Animal numbers were indicated in Figure 7 legend, data was expressed as mean ± SD, p value was analyzed by 1-way ANOVA with posthoc tests, CKO versus f/f control or Nox4<sup>-/-</sup>.

**Supplemental Table 5. Femur bone micro-CT cortical bone parameters in 6-week old male and female wild type and PrxCre<sup>+</sup>/Nox4<sup>fl/fl</sup> (CKO) and Nox4<sup>-/-</sup> mice**

| Parameters                                               | Abbreviation | Units           | Males                                      |            |            |                     |                       |       | Females                                    |            |            |                     |                       |       |
|----------------------------------------------------------|--------------|-----------------|--------------------------------------------|------------|------------|---------------------|-----------------------|-------|--------------------------------------------|------------|------------|---------------------|-----------------------|-------|
|                                                          |              |                 | PrxCre <sup>+</sup> /Nox4 <sup>fl/fl</sup> |            | CKO        | Nox4 <sup>-/-</sup> | Nox4 <sup>fl/fl</sup> |       | PrxCre <sup>+</sup> /Nox4 <sup>fl/fl</sup> |            | CKO        | Nox4 <sup>-/-</sup> | Nox4 <sup>fl/fl</sup> |       |
|                                                          |              |                 | Nox4 <sup>fl/fl</sup>                      | CKO        |            |                     | vs                    | vs    | vs                                         | vs         |            |                     | vs                    | vs    |
| Tissue volume                                            | TV           | mm <sup>3</sup> | 2.16±0.26                                  | 2.07±0.12  | 2.3±0.1    | 0.187               | 0.002                 | 0.136 | 1.98±0.11                                  | 1.91±0.15  | 2.02±0.17  | 0.193               | 0.162                 | 0.319 |
| Bone volume                                              | BV           | mm <sup>3</sup> | 0.8±0.08                                   | 0.76±0.02  | 0.81±0.06  | 0.082               | 0.017                 | 0.356 | 0.71±0.06                                  | 0.67±0.05  | 0.72±0.07  | 0.123               | 0.113                 | 0.394 |
| Percent bone volume                                      | BV/TV        | %               | 36.99±1.82                                 | 36.7±2.34  | 35.25±2.25 | 0.391               | 0.142                 | 0.077 | 35.78±1.5                                  | 35.29±2.19 | 35.65±2.25 | 0.317               | 0.399                 | 0.456 |
| Tissue surface                                           | TS           | mm <sup>2</sup> | 12.34±1.83                                 | 12.87±2.68 | 11.35±0.37 | 0.324               | 0.120                 | 0.132 | 10.49±0.93                                 | 10.32±1.06 | 11.49±2.37 | 0.381               | 0.140                 | 0.167 |
| Peripheral tissue surface                                | TS(per)      | mm <sup>2</sup> | 6.19±0.6                                   | 6.25±0.73  | 6.05±0.14  | 0.424               | 0.281                 | 0.318 | 5.61±0.19                                  | 5.57±0.25  | 5.98±0.71  | 0.383               | 0.091                 | 0.099 |
| Bone surface                                             | BS           | mm <sup>2</sup> | 15.05±1.17                                 | 14.49±0.71 | 15.81±0.94 | 0.123               | 0.006                 | 0.125 | 13.4±0.63                                  | 12.93±0.5  | 13.75±0.95 | 0.073               | 0.043                 | 0.235 |
| Peripheral bone surface                                  | BS(per)      | mm <sup>2</sup> | 11.56±0.76                                 | 11.19±0.49 | 12.06±0.56 | 0.125               | 0.005                 | 0.116 | 10.56±0.39                                 | 10.28±0.36 | 10.84±0.64 | 0.096               | 0.046                 | 0.193 |
| Bone surface / volume ratio                              | BS/BV        | 1/mm            | 18.93±0.96                                 | 19.09±0.63 | 19.49±1.01 | 0.346               | 0.184                 | 0.167 | 18.98±0.77                                 | 19.23±0.74 | 19.19±0.86 | 0.272               | 0.471                 | 0.339 |
| Mean total crosssectional tissue area                    | T.Ar         | mm <sup>2</sup> | 2.14±0.26                                  | 2.05±0.12  | 2.28±0.1   | 0.187               | 0.002                 | 0.136 | 1.96±0.11                                  | 1.89±0.15  | 2±0.16     | 0.193               | 0.162                 | 0.319 |
| Mean total crosssectional tissue perimeter               | T.Pm         | mm              | 6.13±0.6                                   | 6.19±0.72  | 5.99±0.14  | 0.424               | 0.281                 | 0.318 | 5.55±0.19                                  | 5.51±0.25  | 5.92±0.7   | 0.383               | 0.091                 | 0.099 |
| Mean total crosssectional bone area                      | B.Ar         | mm <sup>2</sup> | 0.79±0.08                                  | 0.75±0.02  | 0.8±0.06   | 0.082               | 0.017                 | 0.356 | 0.7±0.06                                   | 0.67±0.05  | 0.71±0.07  | 0.123               | 0.113                 | 0.394 |
| Mean total crosssectional bone perimeter                 | B.Pm         | mm              | 11.44±0.75                                 | 11.08±0.49 | 11.94±0.55 | 0.125               | 0.005                 | 0.116 | 10.46±0.39                                 | 10.18±0.36 | 10.73±0.63 | 0.096               | 0.046                 | 0.193 |
| Average object area per slice                            | Av.Obj.Ar    | mm <sup>2</sup> | 0.79±0.08                                  | 0.75±0.02  | 0.8±0.06   | 0.082               | 0.017                 | 0.356 | 0.7±0.06                                   | 0.67±0.05  | 0.71±0.07  | 0.123               | 0.113                 | 0.394 |
| Average object area-equivalent circle diameter per slice | Av.Obj.ECDa  | mm              | 1±0.05                                     | 0.98±0.01  | 1.01±0.04  | 0.097               | 0.017                 | 0.353 | 0.94±0.04                                  | 0.92±0.03  | 0.95±0.05  | 0.128               | 0.118                 | 0.397 |
| Average moment of inertia (x)                            | Av.MMI(x)    | mm <sup>4</sup> | 0.29±0.04                                  | 0.27±0.02  | 0.32±0.04  | 0.203               | 0.008                 | 0.082 | 0.23±0.03                                  | 0.22±0.03  | 0.26±0.06  | 0.258               | 0.066                 | 0.103 |
| Average moment of inertia (y)                            | Av.MMI(y)    | mm <sup>4</sup> | 0.18±0.04                                  | 0.17±0.03  | 0.18±0.03  | 0.064               | 0.017                 | 0.489 | 0.15±0.02                                  | 0.13±0.02  | 0.15±0.01  | 0.321               | 0.123                 | 0.451 |
| Mean polar moment of inertia                             | MMI(polar)   | mm <sup>4</sup> | 0.47±0.08                                  | 0.44±0.03  | 0.51±0.05  | 0.106               | 0.003                 | 0.204 | 0.37±0.05                                  | 0.35±0.05  | 0.41±0.07  | 0.175               | 0.068                 | 0.185 |
| Average principal moment of inertia (max)                | Av.MMI(max)  | mm <sup>4</sup> | 0.31±0.05                                  | 0.29±0.02  | 0.35±0.04  | 0.140               | 0.003                 | 0.135 | 0.25±0.03                                  | 0.23±0.03  | 0.28±0.05  | 0.191               | 0.055                 | 0.134 |
| Average principal moment of inertia (min)                | Av.MMI(min)  | mm <sup>4</sup> | 0.16±0.03                                  | 0.14±0.01  | 0.16±0.02  | 0.073               | 0.010                 | 0.412 | 0.13±0.01                                  | 0.12±0.01  | 0.13±0.02  | 0.150               | 0.130                 | 0.367 |
| Mean eccentricity                                        | Ecc          |                 | 0.71±0.02                                  | 0.71±0.03  | 0.73±0.01  | 0.221               | 0.125                 | 0.019 | 0.7±0.01                                   | 0.7±0.02   | 0.72±0.02  | 0.467               | 0.038                 | 0.009 |
| Crosssectional thickness                                 | Cs.Th        | mm              | 0.14±0.01                                  | 0.14±0     | 0.13±0.01  | 0.259               | 0.379                 | 0.259 | 0.13±0.01                                  | 0.13±0.01  | 0.13±0.01  | 0.201               | 0.356                 | 0.367 |
| Trabecular thickness (plate model)                       | Tb.Th(pl)    | mm              | 0.11±0.01                                  | 0.1±0      | 0.1±0.01   | 0.328               | 0.199                 | 0.174 | 0.11±0                                     | 0.1±0      | 0.1±0      | 0.269               | 0.467                 | 0.341 |
| Trabecular separation (plate model)                      | Tb.Sp(pl)    | mm              | 0.18±0.02                                  | 0.18±0.02  | 0.19±0.01  | 0.458               | 0.191                 | 0.156 | 0.19±0.01                                  | 0.19±0.02  | 0.19±0.02  | 0.371               | 0.401                 | 0.475 |
| Trabecular number (plate model)                          | Tb.N(pl)     | 1/mm            | 3.5±0.24                                   | 3.5±0.21   | 3.43±0.09  | 0.498               | 0.239                 | 0.266 | 3.39±0.06                                  | 3.39±0.18  | 3.42±0.22  | 0.492               | 0.408                 | 0.376 |
| Trabecular diameter (rod model)                          | Tb.Dm(rd)    | mm              | 0.21±0.01                                  | 0.21±0.01  | 0.21±0.01  | 0.328               | 0.199                 | 0.174 | 0.21±0.01                                  | 0.21±0.01  | 0.21±0.01  | 0.269               | 0.467                 | 0.341 |
| Trabecular separation (rod model)                        | Tb.Sp(rd)    | mm              | 0.1±0.01                                   | 0.1±0.01   | 0.1±0.01   | 0.463               | 0.194                 | 0.162 | 0.1±0                                      | 0.1±0.01   | 0.1±0.01   | 0.380               | 0.402                 | 0.468 |
| Trabecular number (rod model)                            | Tb.N(rd)     | 1/mm            | 3.25±0.18                                  | 3.26±0.11  | 3.26±0.09  | 0.431               | 0.495                 | 0.440 | 3.2±0.07                                   | 3.22±0.11  | 3.23±0.15  | 0.353               | 0.446                 | 0.324 |
| Closed porosity (percent)                                | Po(cl)       | %               | 61.3±4.84                                  | 61.49±4.67 | 64.69±2.23 | 0.467               | 0.090                 | 0.087 | 64.04±1.5                                  | 63.94±3.94 | 62.85±4.95 | 0.477               | 0.347                 | 0.278 |
| Centroid (x)                                             | Crd.X        | mm              | 1.33±0.13                                  | 1.29±0.16  | 1.32±0.19  | 0.301               | 0.382                 | 0.459 | 1.26±0.13                                  | 1.35±0.12  | 1.21±0.07  | 0.097               | 0.034                 | 0.283 |
| Centroid (y)                                             | Crd.Y        | mm              | 1.56±0.14                                  | 1.64±0.19  | 1.52±0.1   | 0.174               | 0.106                 | 0.288 | 1.48±0.15                                  | 1.51±0.17  | 1.46±0.12  | 0.372               | 0.338                 | 0.441 |
| Centroid (z)                                             | Crd.Z        | mm              | 8.62±1.04                                  | 8.53±1.26  | 7.62±2.01  | 0.441               | 0.155                 | 0.128 | 8.21±1.57                                  | 7.7±1.32   | 8.47±1.7   | 0.261               | 0.211                 | 0.402 |
| Mean fractal dimension                                   | FD           |                 | 1.24±0.02                                  | 1.24±0.02  | 1.25±0.01  | 0.453               | 0.167                 | 0.197 | 1.22±0.02                                  | 1.22±0.02  | 1.22±0.01  | 0.421               | 0.341                 | 0.419 |
| Total intersection surface                               | i.S          | mm <sup>2</sup> | 6.1±0.45                                   | 6.08±0.49  | 6.01±0.15  | 0.465               | 0.393                 | 0.351 | 5.57±0.18                                  | 5.55±0.25  | 5.9±0.56   | 0.431               | 0.091                 | 0.089 |

Supplemental Table 5. Micro-CT cortical bone parameters of femur of 6-week old male and female Nox4<sup>fl/fl</sup> control, and PrxCre<sup>+</sup>Nox4<sup>fl/fl</sup> CKO and Nox4<sup>-/-</sup> mice. Animal numbers were indicated in Figure 7 legend, data was expressed as mean ± SD, p value was analyzed by 1-way ANOVA with posthoc tests, CKO versus f/f control or Nox4<sup>-/-</sup>.



**Supplemental Table 6. Femur bone micro-CT trabecular bone parameters in 13-week old male and female wild type and PrxCre<sup>+</sup>/Nox4<sup>fl/fl</sup> (CKO) and Nox4<sup>-/-</sup> mice**

| Parameters                  | Abbreviation | Units             | Males                 |    |                                            |    |                     |       | Females               |       |                                            |    |                     |    |            |       |       |       |
|-----------------------------|--------------|-------------------|-----------------------|----|--------------------------------------------|----|---------------------|-------|-----------------------|-------|--------------------------------------------|----|---------------------|----|------------|-------|-------|-------|
|                             |              |                   | Nox4 <sup>fl/fl</sup> |    | PrxCre <sup>+</sup> /Nox4 <sup>fl/fl</sup> |    | Nox4 <sup>-/-</sup> |       | Nox4 <sup>fl/fl</sup> |       | PrxCre <sup>+</sup> /Nox4 <sup>fl/fl</sup> |    | Nox4 <sup>-/-</sup> |    |            |       |       |       |
|                             |              |                   | CKO                   | vs | CKO                                        | vs | CKO                 | vs    | CKO                   | vs    | CKO                                        | vs | CKO                 | vs |            |       |       |       |
| Tissue volume               | TV           | mm <sup>3</sup>   | 4.15±0.4              |    | 4±0.2                                      |    | 4.06±0.48           | 0.188 | 0.384                 | 0.188 | 3.28±0.28                                  |    | 3.19±0.15           |    | 3.2±0.18   | 0.206 | 0.450 | 0.206 |
| Bone volume                 | BV           | mm <sup>3</sup>   | 0.47±0.08             |    | 0.45±0.04                                  |    | 0.53±0.17           | 0.274 | 0.120                 | 0.274 | 0.21±0.02                                  |    | 0.22±0.02           |    | 0.21±0.03  | 0.158 | 0.138 | 0.158 |
| Percent bone volume         | BV/TV        | %                 | 11.26±1.71            |    | 11.18±0.87                                 |    | 11.93±1.7           | 0.451 | 0.162                 | 0.451 | 6.32±0.58                                  |    | 6.93±0.83           |    | 6.43±0.94  | 0.084 | 0.132 | 0.084 |
| Tissue surface              | TS           | mm <sup>2</sup>   | 18.29±1.05            |    | 18.03±0.53                                 |    | 18.34±1.66          | 0.279 | 0.324                 | 0.279 | 15.55±0.82                                 |    | 15.37±0.32          |    | 15.62±0.54 | 0.275 | 0.130 | 0.275 |
| Bone surface                | BS           | mm <sup>2</sup>   | 38.09±5.45            |    | 36.4±1.7                                   |    | 41.42±10.02         | 0.221 | 0.108                 | 0.221 | 19.3±1.62                                  |    | 20.01±1.78          |    | 19.05±2.25 | 0.235 | 0.171 | 0.235 |
| Intersection surface        | i.S          | mm <sup>2</sup>   | 1.36±0.29             |    | 1.35±0.19                                  |    | 1.63±0.53           | 0.472 | 0.104                 | 0.472 | 0.67±0.17                                  |    | 0.68±0.09           |    | 0.69±0.11  | 0.456 | 0.437 | 0.456 |
| Bone surface / volume ratio | BS/BV        | 1/mm              | 81.99±5.02            |    | 81.73±5.2                                  |    | 80.14±7.2           | 0.459 | 0.326                 | 0.459 | 93.5±3.49                                  |    | 91.01±2.59          |    | 93.2±3.74  | 0.070 | 0.087 | 0.070 |
| Bone surface density        | BS/TV        | 1/mm              | 9.17±0.91             |    | 9.1±0.27                                   |    | 10.09±1.23          | 0.424 | 0.031                 | 0.424 | 5.9±0.4                                    |    | 6.29±0.61           |    | 5.96±0.65  | 0.109 | 0.152 | 0.109 |
| Trabecular pattern factor   | Tb.Pf        | 1/mm              | 27.11±3.96            |    | 28.5±1.87                                  |    | 26.11±5.2           | 0.203 | 0.140                 | 0.203 | 34.88±2.06                                 |    | 33.18±1.65          |    | 35.3±2.22  | 0.053 | 0.019 | 0.053 |
| Centroid (x)                | Crd.X        | mm                | 1.28±0.08             |    | 1.28±0.1                                   |    | 1.32±0.06           | 0.483 | 0.224                 | 0.483 | 1.23±0.19                                  |    | 1.26±0.11           |    | 1.33±0.13  | 0.385 | 0.121 | 0.385 |
| Centroid (y)                | Crd.Y        | mm                | 1.5±0.07              |    | 1.49±0.1                                   |    | 1.49±0.11           | 0.375 | 0.480                 | 0.375 | 1.38±0.26                                  |    | 1.49±0.13           |    | 1.39±0.11  | 0.145 | 0.050 | 0.145 |
| Centroid (z)                | Crd.Z        | mm                | 10.52±0.86            |    | 10.9±1.49                                  |    | 10.68±1.58          | 0.256 | 0.400                 | 0.256 | 11.03±1.02                                 |    | 10.29±1.78          |    | 9.81±0.6   | 0.206 | 0.250 | 0.206 |
| Structure model index       | SMI          |                   | 1.98±0.2              |    | 2.09±0.08                                  |    | 1.94±0.24           | 0.086 | 0.066                 | 0.086 | 2.24±0.05                                  |    | 2.19±0.06           |    | 2.27±0.05  | 0.072 | 0.006 | 0.072 |
| Trabecular thickness        | Tb.Th        | mm                | 0.05±0                |    | 0.05±0                                     |    | 0.05±0              | 0.194 | 0.365                 | 0.194 | 0.04±0                                     |    | 0.04±0              |    | 0.04±0     | 0.323 | 0.397 | 0.323 |
| Trabecular number           | Tb.N         | 1/mm              | 2.5±0.33              |    | 2.41±0.1                                   |    | 2.78±0.44           | 0.256 | 0.026                 | 0.256 | 1.51±0.11                                  |    | 1.64±0.19           |    | 1.51±0.19  | 0.080 | 0.094 | 0.080 |
| Trabecular separation       | Tb.Sp        | mm                | 0.2±0.01              |    | 0.2±0                                      |    | 0.19±0.01           | 0.092 | 0.046                 | 0.092 | 0.26±0.02                                  |    | 0.25±0.01           |    | 0.25±0.01  | 0.033 | 0.122 | 0.033 |
| Eigenvalue 1                |              |                   | 2.39±1.02             |    | 2.47±0.5                                   |    | 2.44±0.78           | 0.430 | 0.471                 | 0.430 | 1.58±0.19                                  |    | 1.27±0.29           |    | 1.63±0.43  | 0.024 | 0.027 | 0.024 |
| Eigenvalue 2                |              |                   | 3.87±1.62             |    | 3.8±0.78                                   |    | 3.81±1.31           | 0.459 | 0.489                 | 0.459 | 2.33±0.34                                  |    | 1.91±0.37           |    | 2.27±0.48  | 0.026 | 0.048 | 0.026 |
| Eigenvalue 3                |              |                   | 4.35±1.77             |    | 4.33±0.83                                  |    | 4.21±1.53           | 0.492 | 0.430                 | 0.492 | 2.59±0.35                                  |    | 2.1±0.43            |    | 2.49±0.54  | 0.024 | 0.063 | 0.024 |
| BMD                         |              | g/cm <sup>3</sup> | 0.23±0.03             |    | 0.22±0.05                                  |    | 0.26±0.04           | 0.452 | 0.107                 | 0.452 | 0.26±0.09                                  |    | 0.23±0.05           |    | 0.21±0.05  | 0.268 | 0.192 | 0.268 |

Supplemental Table 6. Micro-CT trabecular bone parameters of femur of 13-week old male and female Nox4<sup>fl/fl</sup> control, and PrxCre<sup>+</sup>Nox4<sup>fl/fl</sup> CKO and Nox4<sup>-/-</sup> mice. Animal numbers were indicated in Figure 7 legend, data was expressed as mean ± SD, p value was analyzed by 1-way ANOVA with posthoc tests, CKO versus f/f control or Nox4<sup>-/-</sup>.

**Supplemental Table 7. Femur bone micro-CT cortical bone parameters in 13-week old male and female wild type and PrxCre<sup>+</sup>/Nox4<sup>fl/fl</sup> (CKO) and Nox4<sup>-/-</sup> mice**

| Parameters                                               | Abbreviation | Units           | Males                 |                                           |                     | Females               |       |                       | Nox4 <sup>fl/fl</sup> |            |                       | Nox4 <sup>-/-</sup> |                       |       |
|----------------------------------------------------------|--------------|-----------------|-----------------------|-------------------------------------------|---------------------|-----------------------|-------|-----------------------|-----------------------|------------|-----------------------|---------------------|-----------------------|-------|
|                                                          |              |                 | Nox4 <sup>fl/fl</sup> | PrxCre <sup>+</sup> Nox4 <sup>fl/fl</sup> | Nox4 <sup>-/-</sup> | Nox4 <sup>fl/fl</sup> | CKO   | Nox4 <sup>fl/fl</sup> | Nox4 <sup>fl/fl</sup> | CKO        | Nox4 <sup>fl/fl</sup> | CKO                 | Nox4 <sup>fl/fl</sup> |       |
|                                                          |              |                 | vs                    | vs                                        | vs                  | vs                    | vs    | vs                    | vs                    | vs         | vs                    | vs                  |                       |       |
| Tissue volume                                            | TV           | mm <sup>3</sup> | 2.35±0.2              | 2.25±0.13                                 | 2.29±0.32           | 0.134                 | 0.387 | 0.325                 | 1.97±0.14             | 1.88±0.08  | 1.9±0.12              | 0.068               | 0.288                 | 0.215 |
| Bone volume                                              | BV           | mm <sup>3</sup> | 0.95±0.09             | 0.94±0.07                                 | 0.96±0.13           | 0.442                 | 0.388 | 0.421                 | 0.92±0.07             | 0.89±0.03  | 0.9±0.04              | 0.156               | 0.267                 | 0.324 |
| Percent bone volume                                      | BV/TV        | %               | 40.45±1.85            | 41.94±1.52                                | 42±1.37             | 0.050                 | 0.468 | 0.049                 | 46.66±1.7             | 47.5±1.62  | 47.37±1.06            | 0.186               | 0.430                 | 0.196 |
| Tissue surface                                           | TS           | mm <sup>2</sup> | 11.92±1.1             | 11.73±1.28                                | 12.56±2.18          | 0.377                 | 0.208 | 0.222                 | 10.71±0.94            | 9.83±0.28  | 10.1±0.6              | 0.007               | 0.107                 | 0.100 |
| Peripheral tissue surface                                | TS(per)      | mm <sup>2</sup> | 6.28±0.39             | 6.18±0.3                                  | 6.3±0.44            | 0.276                 | 0.289 | 0.477                 | 5.73±0.23             | 5.49±0.1   | 5.64±0.31             | 0.006               | 0.077                 | 0.306 |
| Bone surface                                             | BS           | mm <sup>2</sup> | 17.87±2.22            | 17.64±2.04                                | 18.13±3.23          | 0.416                 | 0.374 | 0.427                 | 14.45±0.54            | 14.06±0.38 | 13.73±0.95            | 0.064               | 0.165                 | 0.080 |
| Peripheral bone surface                                  | BS(per)      | mm <sup>2</sup> | 13.15±1.4             | 12.97±1.42                                | 13.16±2             | 0.397                 | 0.421 | 0.495                 | 10.67±0.38            | 10.41±0.19 | 10.28±0.62            | 0.048               | 0.269                 | 0.122 |
| Bone surface / volume ratio                              | BS/BV        | 1/mm            | 18.8±1.16             | 18.66±0.86                                | 18.8±0.75           | 0.392                 | 0.382 | 0.495                 | 15.81±0.83            | 15.79±0.46 | 15.22±0.51            | 0.480               | 0.015                 | 0.079 |
| Mean total crosssectional tissue area                    | T.Ar         | mm <sup>2</sup> | 2.33±0.2              | 2.23±0.13                                 | 2.27±0.32           | 0.134                 | 0.387 | 0.325                 | 1.95±0.14             | 1.86±0.08  | 1.89±0.12             | 0.068               | 0.288                 | 0.215 |
| Mean total crosssectional tissue perimeter               | T.Pm         | mm              | 6.22±0.38             | 6.12±0.29                                 | 6.23±0.44           | 0.276                 | 0.289 | 0.477                 | 5.67±0.23             | 5.43±0.1   | 5.59±0.31             | 0.006               | 0.077                 | 0.306 |
| Mean total crosssectional bone area                      | B.Ar         | mm <sup>2</sup> | 0.94±0.08             | 0.93±0.07                                 | 0.95±0.13           | 0.442                 | 0.388 | 0.421                 | 0.91±0.07             | 0.88±0.03  | 0.89±0.04             | 0.156               | 0.267                 | 0.324 |
| Mean total crosssectional bone perimeter                 | B.Pm         | mm              | 13.02±1.39            | 12.84±1.4                                 | 13.03±1.98          | 0.397                 | 0.421 | 0.495                 | 10.57±0.38            | 10.31±0.19 | 10.18±0.62            | 0.048               | 0.269                 | 0.122 |
| Average object area per slice                            | Av.Obj.Ar    | mm <sup>2</sup> | 0.94±0.08             | 0.93±0.07                                 | 0.95±0.13           | 0.442                 | 0.388 | 0.421                 | 0.91±0.07             | 0.88±0.03  | 0.89±0.04             | 0.156               | 0.267                 | 0.324 |
| Average object area-equivalent circle diameter per slice | Av.Obj.ECda  | mm              | 1.09±0.05             | 1.09±0.04                                 | 1.1±0.08            | 0.449                 | 0.406 | 0.436                 | 1.07±0.04             | 1.06±0.02  | 1.07±0.03             | 0.164               | 0.275                 | 0.329 |
| Average moment of inertia (x)                            | Av.MMI(x)    | mm <sup>4</sup> | 0.42±0.08             | 0.41±0.08                                 | 0.43±0.14           | 0.413                 | 0.391 | 0.442                 | 0.3±0.05              | 0.28±0.02  | 0.3±0.04              | 0.165               | 0.187                 | 0.418 |
| Average moment of inertia (y)                            | Av.MMI(y)    | mm <sup>4</sup> | 0.19±0.03             | 0.18±0.02                                 | 0.19±0.05           | 0.119                 | 0.290 | 0.416                 | 0.17±0.02             | 0.15±0.02  | 0.16±0.03             | 0.062               | 0.206                 | 0.269 |
| Mean polar moment of inertia                             | MMI(polar)   | mm <sup>4</sup> | 0.62±0.11             | 0.59±0.09                                 | 0.62±0.17           | 0.317                 | 0.359 | 0.478                 | 0.47±0.07             | 0.43±0.03  | 0.45±0.05             | 0.087               | 0.129                 | 0.344 |
| Average principal moment of inertia (max)                | Av.MMI(max)  | mm <sup>4</sup> | 0.45±0.08             | 0.44±0.08                                 | 0.46±0.13           | 0.426                 | 0.410 | 0.454                 | 0.33±0.06             | 0.31±0.02  | 0.33±0.04             | 0.118               | 0.079                 | 0.435 |
| Average principal moment of inertia (min)                | Av.MMI(min)  | mm <sup>4</sup> | 0.17±0.02             | 0.15±0.01                                 | 0.16±0.04           | 0.064                 | 0.213 | 0.444                 | 0.14±0.02             | 0.12±0.01  | 0.13±0.02             | 0.047               | 0.360                 | 0.145 |
| Mean eccentricity                                        | Ecc          |                 | 0.79±0.02             | 0.81±0.03                                 | 0.8±0.02            | 0.086                 | 0.257 | 0.288                 | 0.76±0.02             | 0.77±0.02  | 0.78±0.02             | 0.212               | 0.092                 | 0.047 |
| Crosssectional thickness                                 | Cs.Th        | mm              | 0.14±0.01             | 0.15±0.01                                 | 0.15±0              | 0.361                 | 0.475 | 0.338                 | 0.17±0.01             | 0.17±0     | 0.18±0.01             | 0.439               | 0.044                 | 0.195 |
| Trabecular thickness (plate model)                       | Tb.Th(pl)    | mm              | 0.11±0.01             | 0.11±0                                    | 0.11±0              | 0.408                 | 0.373 | 0.476                 | 0.13±0.01             | 0.13±0     | 0.13±0                | 0.494               | 0.014                 | 0.079 |
| Trabecular separation (plate model)                      | Tb.Sp(pl)    | mm              | 0.16±0.01             | 0.15±0.01                                 | 0.15±0.01           | 0.098                 | 0.387 | 0.037                 | 0.15±0.01             | 0.14±0.01  | 0.15±0                | 0.214               | 0.105                 | 0.398 |
| Trabecular number (plate model)                          | Tb.N(pl)     | 1/mm            | 3.8±0.21              | 3.91±0.27                                 | 3.95±0.16           | 0.165                 | 0.405 | 0.078                 | 3.69±0.17             | 3.75±0.18  | 3.6±0.09              | 0.259               | 0.035                 | 0.155 |
| Trabecular diameter (rod model)                          | Tb.Dm(rd)    | mm              | 0.21±0.01             | 0.21±0.01                                 | 0.21±0.01           | 0.408                 | 0.373 | 0.476                 | 0.25±0.01             | 0.25±0.01  | 0.26±0.01             | 0.494               | 0.014                 | 0.079 |
| Trabecular separation (rod model)                        | Tb.Sp(rd)    | mm              | 0.08±0.01             | 0.08±0.01                                 | 0.08±0              | 0.094                 | 0.390 | 0.036                 | 0.08±0.01             | 0.07±0.01  | 0.08±0                | 0.208               | 0.131                 | 0.466 |
| Trabecular number (rod model)                            | Tb.N(rd)     | 1/mm            | 3.37±0.18             | 3.41±0.19                                 | 3.44±0.13           | 0.340                 | 0.390 | 0.228                 | 3.04±0.14             | 3.07±0.11  | 2.95±0.08             | 0.356               | 0.017                 | 0.095 |
| Mean trabecular pattern factor                           | Tb.Pf        | 1/mm            | -1.12±0.51            | -1.14±0.6                                 | -1.32±0.62          | 0.468                 | 0.303 | 0.246                 | -0.76±0.19            | -0.71±0.21 | -0.59±0.28            | 0.313               | 0.160                 | 0.125 |
| Closed porosity (percent)                                | Po(d)        | %               | 59.38±1.79            | 57.87±1.46                                | 57.5±1.79           | 0.043                 | 0.345 | 0.031                 | 53.11±1.66            | 52.99±1.64 | 52.48±1.02            | 0.220               | 0.451                 | 0.216 |
| Centroid (x)                                             | Crd.X        | mm              | 1.27±0.11             | 1.21±0.11                                 | 1.23±0.17           | 0.149                 | 0.396 | 0.299                 | 1.23±0.2              | 1.17±0.14  | 1.28±0.14             | 0.248               | 0.056                 | 0.296 |
| Centroid (y)                                             | Crd.Y        | mm              | 1.66±0.17             | 1.57±0.16                                 | 1.49±0.08           | 0.146                 | 0.132 | 0.017                 | 1.4±0.09              | 1.41±0.08  | 1.37±0.09             | 0.420               | 0.163                 | 0.276 |
| Centroid (z)                                             | Crd.Z        | mm              | 9.15±0.88             | 9.53±1.48                                 | 9.28±1.58           | 0.259                 | 0.388 | 0.417                 | 9.6±1.05              | 8.83±1.78  | 8.35±0.61             | 0.198               | 0.252                 | 0.013 |
| Mean fractal dimension                                   | FD           |                 | 1.28±0.03             | 1.29±0.02                                 | 1.3±0.05            | 0.337                 | 0.288 | 0.189                 | 1.26±0.02             | 1.26±0.03  | 1.25±0.02             | 0.412               | 0.135                 | 0.193 |
| Total intersection surface                               | I.S          | mm <sup>2</sup> | 6.24±0.3              | 6.16±0.29                                 | 6.25±0.44           | 0.311                 | 0.345 | 0.478                 | 5.68±0.24             | 5.48±0.1   | 5.58±0.21             | 0.018               | 0.104                 | 0.228 |

Supplemental Table 7. Micro-CT cortical bone parameters of femur of 6-week old male and female Nox4<sup>fl/fl</sup> control, and PrxCre<sup>+</sup>Nox4<sup>fl/fl</sup> CKO and Nox4<sup>-/-</sup> mice. Animal numbers were indicated in Figure 7 legend, data was expressed as mean ± SD, p value was analyzed by 1-way ANOVA with posthoc tests, CKO versus f/f control or Nox4<sup>-/-</sup>.

**Supplementary Table 8.** Chemical reagents, antibodies, proteins, cell lines, mice and assay kits used for this investigation

| <b>Chemical Reagents</b>                               | <b>Source</b>                                                  | <b>Catalogue #</b> |
|--------------------------------------------------------|----------------------------------------------------------------|--------------------|
| Amido Black Staining Solution                          | Sigma (MO, USA)                                                | A8181              |
| MEM $\alpha$ , nucleosides, no phenol red              | ThermoFisher (MA, USA)                                         | 41061029           |
| Fetal Bovine Serum (FBS), United States                | ThermoFisher (MA, USA)                                         | 26140079           |
| Penicillin-Streptomycin (5,000 U/mL)                   | ThermoFisher (MA, USA)                                         | 15070063           |
| Recombinant Mouse TRANCE/TNFSF11/RANK L                | R&D Systems (MN, USA)                                          | 462-TEC            |
| Acid Phosphatase, Leukocyte Kit                        | Sigma (MO, USA)                                                | 386                |
| Osteo Assay Surface Microplate                         | Corning (AZ, USA)                                              | CLS3989            |
| Formalin, Buffered PBS, 10%                            | FisherScientific (MA, USA)                                     | SF100-4            |
| Glutaraldehyde 2.5% in Phosphate Buffer                | FisherScientific (MA, USA)                                     | 50-366-996         |
| Von Kossa Stain Kit                                    | Abcam (MA, USA)                                                | ab150687           |
| TRI Reagent™ Solution                                  | Invitrogen (CA, USA)                                           | AM9738             |
| DNase Max Kit                                          | QIAGEN (MD, USA)                                               | 15200-50           |
| iScript™ cDNA Synthesis Kit                            | Bio-Rad (CA, USA)                                              | 1708890            |
| Fast SYBR™ Green Master Mix                            | ThermoFisher (MA, USA)                                         | 4385612            |
| RIPA Lysis and Extraction Buffer                       | ThermoFisher (MA, USA)                                         | 89901              |
| SuperSignal™ West Pico PLUS Chemiluminescent Substrate | ThermoFisher (MA, USA)                                         | 34577              |
| DNeasy PowerSoil Pro Kit                               | QIAGEN (MD, USA)                                               | 47014              |
| <b>Antibodies</b>                                      | <b>Source</b>                                                  | <b>Catalogue #</b> |
| <u>Prx1</u>                                            | OriGene                                                        | Cat# AP23064PU-N   |
| CathepsinK                                             | Abcam (MA, USA)                                                | ab187647           |
| <b>Assay Kits</b>                                      | <b>Source</b>                                                  | <b>Catalogue #</b> |
| Cell-based ROS/superoxide detection assay kit          | Abcam (abcam.com)                                              | cat#ab139476       |
| Non-Radioactive cell proliferation assay               | Promega Corporation                                            | Part#TB169         |
| CTX 1                                                  | MyBioSource (CA, USA)                                          | MBS722404          |
| P1NP                                                   | MyBioSource (CA, USA)                                          | MBS2500076         |
| Cathepsin K                                            | mybiosource.com                                                | cat#MBS164601      |
| <b>Mice</b>                                            | <b>Source</b>                                                  | <b>Catalogue #</b> |
| <i>Nox4<sup>fl/fl</sup></i>                            | Louisiana State University Health Sciences Center, New Orleans |                    |
| <i>PrxCre<sup>+/-</sup> Nox4<sup>fl/fl</sup></i>       | Louisiana State University Health Sciences Center, New Orleans |                    |

|                           |                                                                      |                    |
|---------------------------|----------------------------------------------------------------------|--------------------|
| <i>Nox4<sup>-/-</sup></i> | Louisiana State University<br>Health Sciences Center, New<br>Orleans |                    |
| <b>Animal Diet</b>        | <b>Source</b>                                                        | <b>Catalogue #</b> |
| AIN-93G diet              | Harlan Industries, Indianapolis,<br>IN                               |                    |

**Supplementary Table 9.** Sequence of primer.

| Gene        | Sequence (5' – 3')            |                                 |
|-------------|-------------------------------|---------------------------------|
|             | Forward                       | Reverse                         |
| mNox1       | ATG CCC CTG CTG CTC GAA TA    | AAA TTG CCC CTC CAT TTC CT      |
| mGAPDH      | GTA TGA CTC CAC TCA CGG CAA A | GGT CTC GCT CCT GGA AGA TG      |
| mTNFa       | GAC GTG GAA CTG GCA GAA GAG   | GCC ACA AGC AGG AAT GAG AAG     |
| mTRAP       | TGG TCC AGG AGC TTA ACT GC    | GTC AGG AGT GGG AGC CAT ATG     |
| mCathepsinK | GTG GGT GTT CAA GTT TCT GC    | GGT GAG TCT TCT TCC ATA GC      |
| mNox2       | ACC GCC ATC CAC ACA ATT G     | CCG ATG TCA GAG AGA GCT ATT GAA |
| mNox4       | CTG CAT CTG TCC TGA ACC TCA A | TCT CCT GCT AGG GAC CTT CTG T   |
| mALP        | TAA CCG CTA CCC GGA TCC TA    | TGT CTT GGA CAG AGC CAT GTG     |
| mb-Catenin  | AAC TGC GTG GAT GGG ATC TG    | GAT ATT GAC GGG CAG TAT GCA A   |
| mNFaTc1     | GATCCCGTTGCTTCCAGAAAAT        | TCTGTCTCCCCTTTCCTCAGCT          |
| mNFkB       | CCT CTGGCGAATGGCTTTAC         | GCTATGGAT ACTGCGGTCTGG          |

## Supplementary Results: bone marrow RNA sequencing

### Groups:

3 weeks old (3 wk) male (M) and female (F) mice of genotypes *Nox4<sup>fl/fl</sup>* (Flx), *PrxCre<sup>+/-</sup>* *Nox4<sup>fl/fl</sup>* (Prx) and *Nox4<sup>-/-</sup>* (Nox4 0).

32 weeks old (32 wk) male (M) and female (F) mice of genotypes *Nox4<sup>fl/fl</sup>* (Flx), *PrxCre<sup>+/-</sup>* *Nox4<sup>fl/fl</sup>* (Prx) and *Nox4<sup>-/-</sup>* (Nox4 0).

There were 3 samples per group, with each sample a pool of RNA from 2-4 mice. The data set is thus from a complete 2 x 2 x 3 factorial design with the two sexes, two ages (3 weeks and 32 weeks) and three genotypes (*Nox4<sup>fl/fl</sup>*, *PrxCre<sup>+/-</sup>* *Nox4<sup>fl/fl</sup>*, and *Nox4<sup>-/-</sup>*).

The data set quantified expression for 24623 genes. Of these, 20602 had at least 1 raw count. 14338 genes had an average of at least 10 raw counts per sample.

The 10 genes with the highest average normalized expression were:

|        |                                              |
|--------|----------------------------------------------|
| Hba-a1 | Hemoglobin                                   |
| Hba-a2 | Hemoglobin                                   |
| Hbb-b1 | Hemoglobin                                   |
| Hbb-bs | Hemoglobin                                   |
| S100a9 | Immune/inflammatory role                     |
| Slc4a1 | Red blod cell chloride/bicarbonate exchanger |
| Eef1a1 | Translation elongation factor                |
| Ngp    | Neutrophilic granule protein                 |
| Hbb-b2 | Hemoglobin                                   |
| Hbb-bt | Hemoglobin                                   |

These are genes that are expected to be highly expressed in bone marrow.

In terms of abundance, *Nox4* was poorly expressed at no. 17601 on the list with very low raw counts:

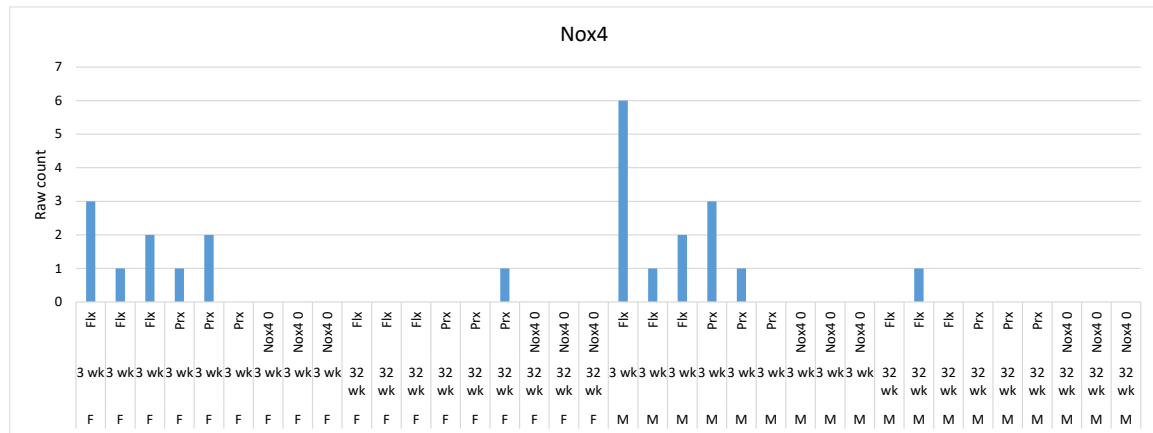

Based on the normalized gene counts, an analysis of variance (ANOVA) for each gene was calculated. We consider ANOVA well-suited for analysis of normalized counts as long as the counts are not too low. An average raw count of at least 10 was chosen as criterion for conducting ANOVA. There were 14338 genes fulfilling this criterion.

The *main effects* of Age, Sex and Genotype were explored. They showed least significant difference (LSD), i.e., without adjustments for multiplicity of genes, at  $P < 0.05$  for 11711, 2784 and 3533 genes, respectively. These numbers were higher than what one would expect by chance ( $14338 * 0.05 = 717$  genes).

The following figure shows partitioning of the variance for genes for which there was a significant treatment effect at LSD  $P < 0.05$ .

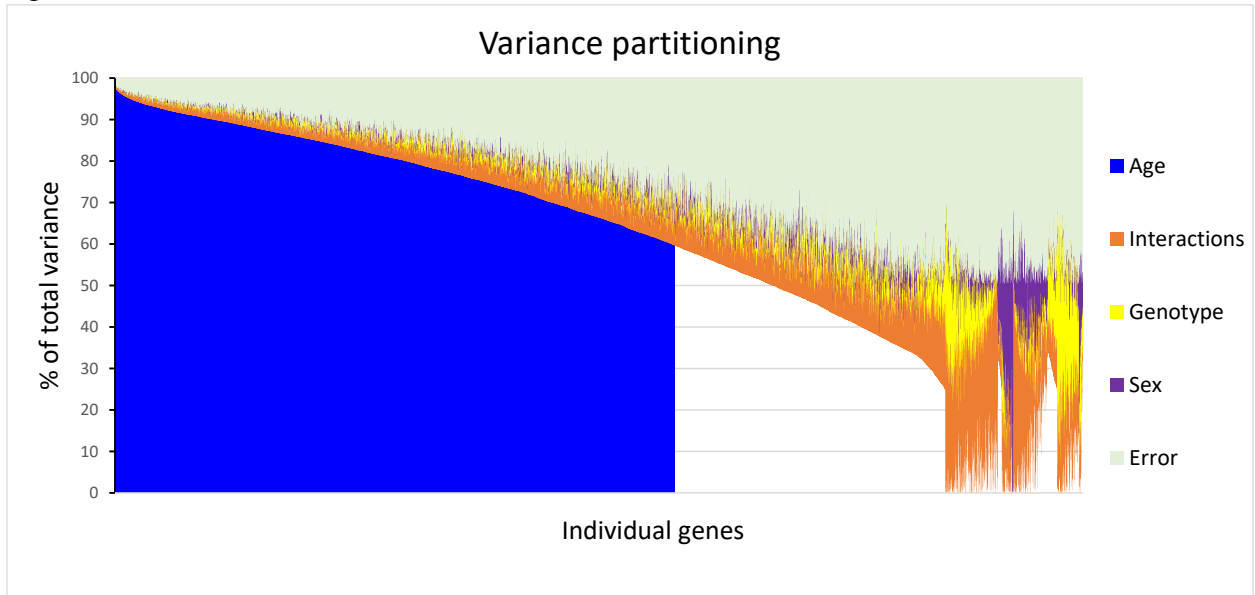

It underscores that for most genes, age is the most important variable affecting gene expression.

### Age

The expression of most genes was highly dependent on the age of the mice.

The gene with lowest P-value for a main effect of age was *Efemp1*, which essentially was only expressed in the older mice.

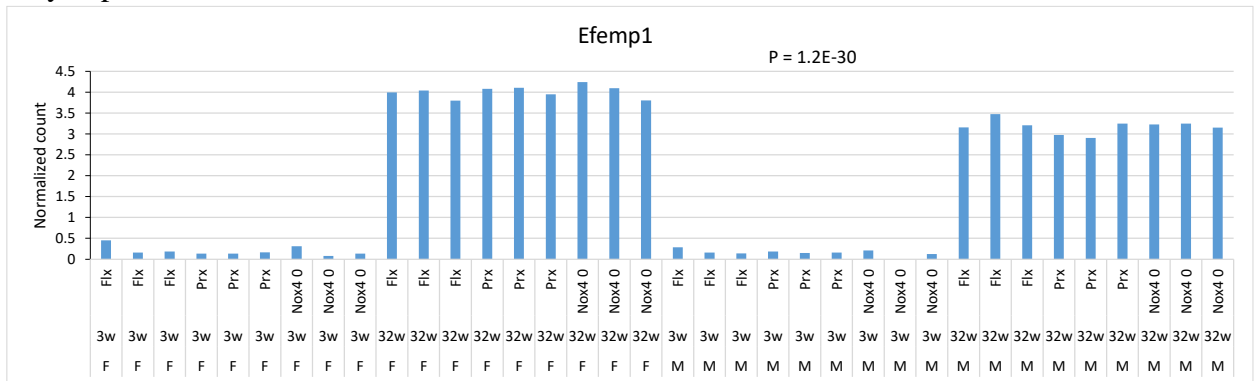

Volcano plot for main effect of age:

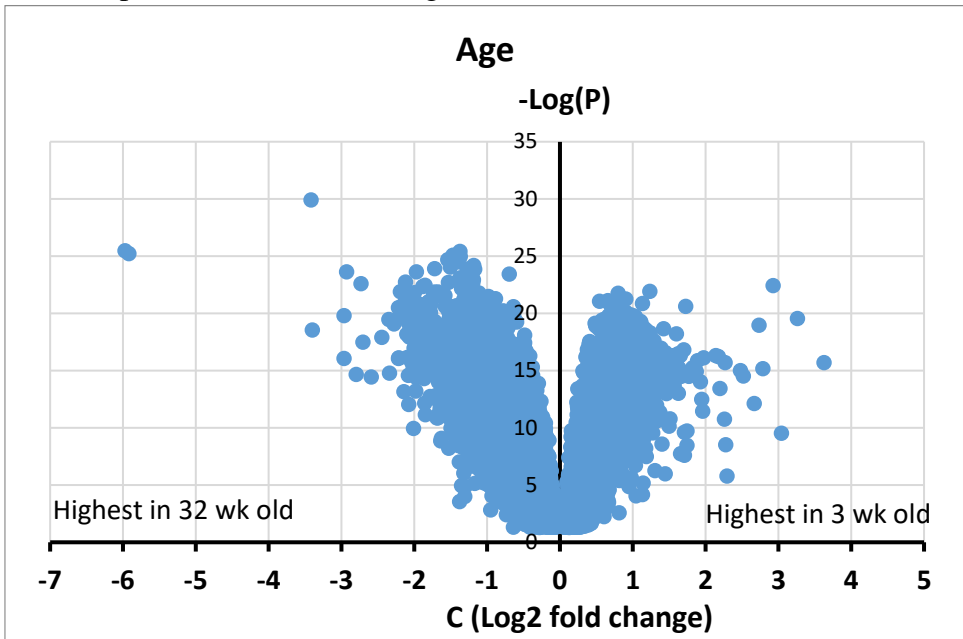

Many genes had > 2-fold expression difference (absolute value of C > 1) at 3 and 32 weeks of age. The following heat map are for genes with a main significant age difference and an absolute value of C > 1:

Genes with significant main age effect and min C of 1.0

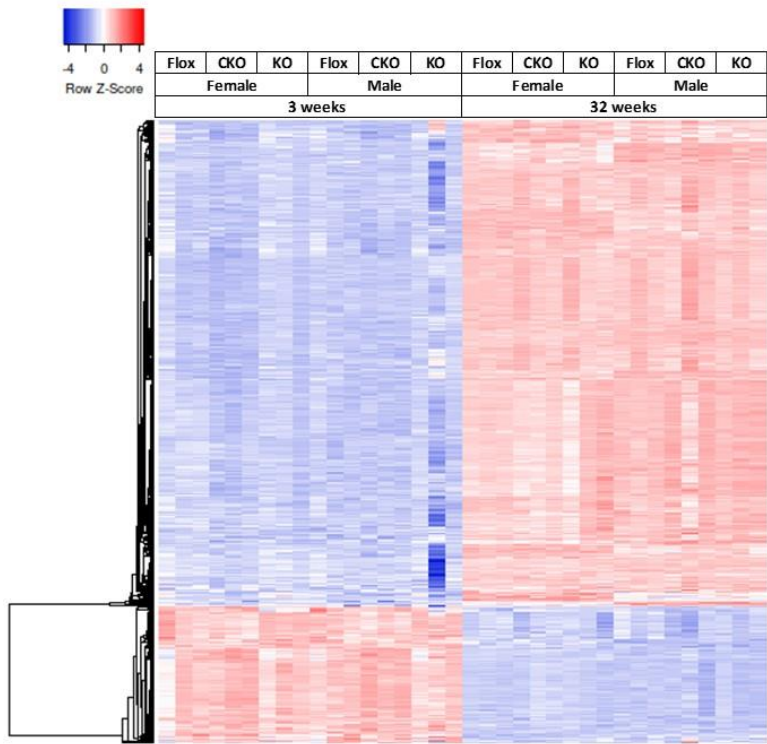

There were genes with highest expression at either 3 weeks of age or 32 weeks of age with the latter groups being most abundant.



Sex

Volcano plot for main effect of sex:

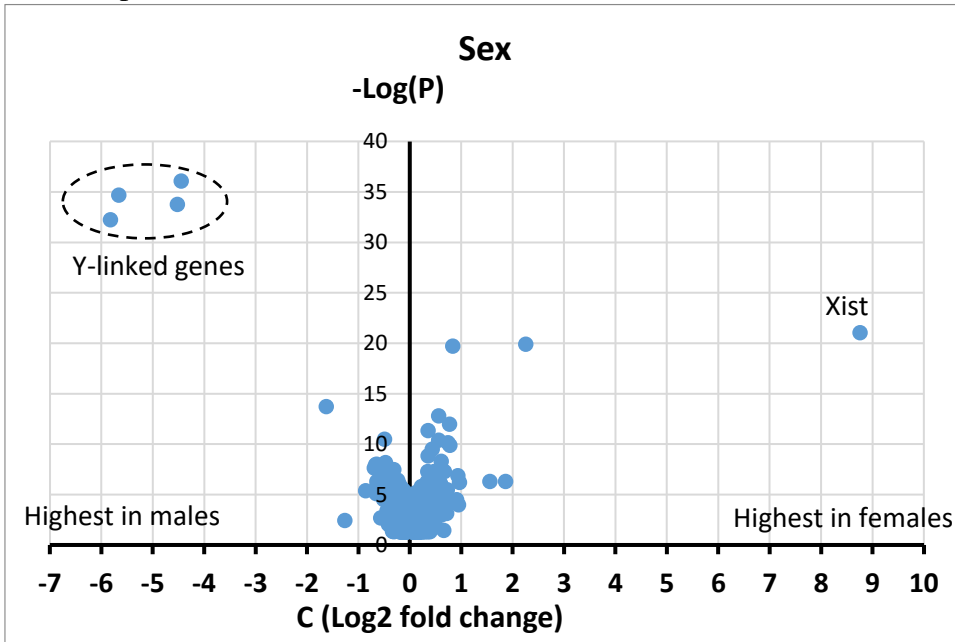

The 4 genes with male-exclusive expression are the Y-linked genes *Kdm5d*, *Eif2s3y*, *Uty* and *Ddx3y*.

*Xist* is an X-linked gene responsible for X-

chromosome inactivation in females.

The following heat map are for genes with a main significant sex difference and an absolute value of  $C > 0.3$ .

Genes with significant main sex effect and min C of 0.3

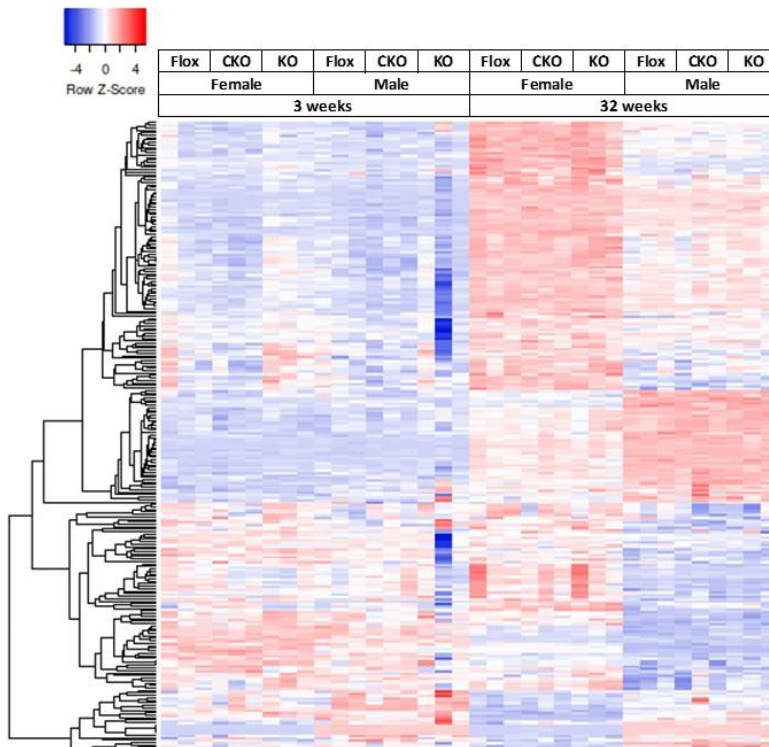

The sex effect was most pronounced at 32 weeks of age.

## Genotype

The gene with the strongest genotype effect was *Cyp2s1*.

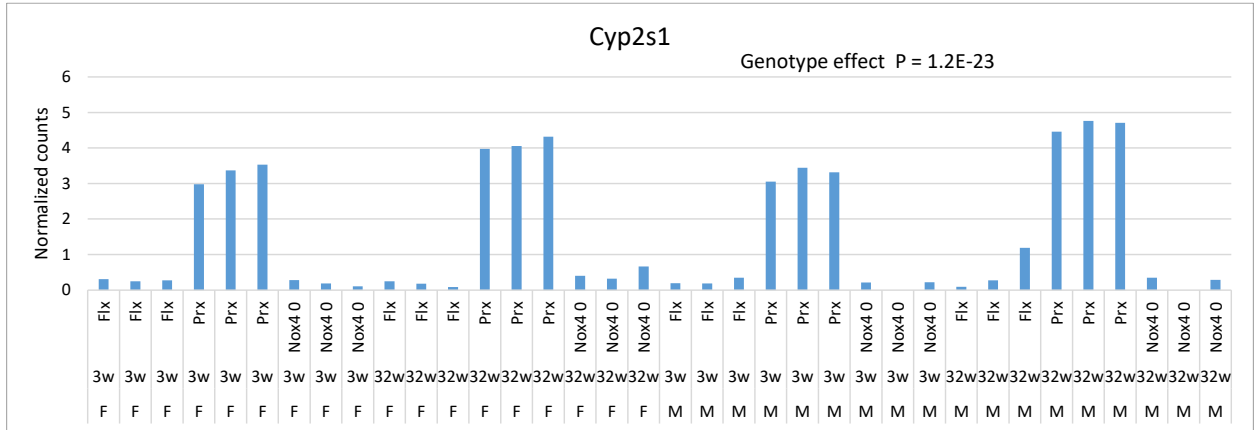

It was expressed predominantly in the *PrxCre +/- Nox4 fl/fl* genotype.

The main genotype effect with two degrees of freedom was separated into two orthogonal contrasts. The first was a contrast of the expression in the conditional knockout versus the expression in the whole body knockout. The second compared the expression in the control *Nox4 fl/fl* genotype with the average expression of the two knockout genotypes. These two contrasts are significant at LSD  $P < 0.05$  for 4275 and 749 genes, respectively.

Volcano plots:

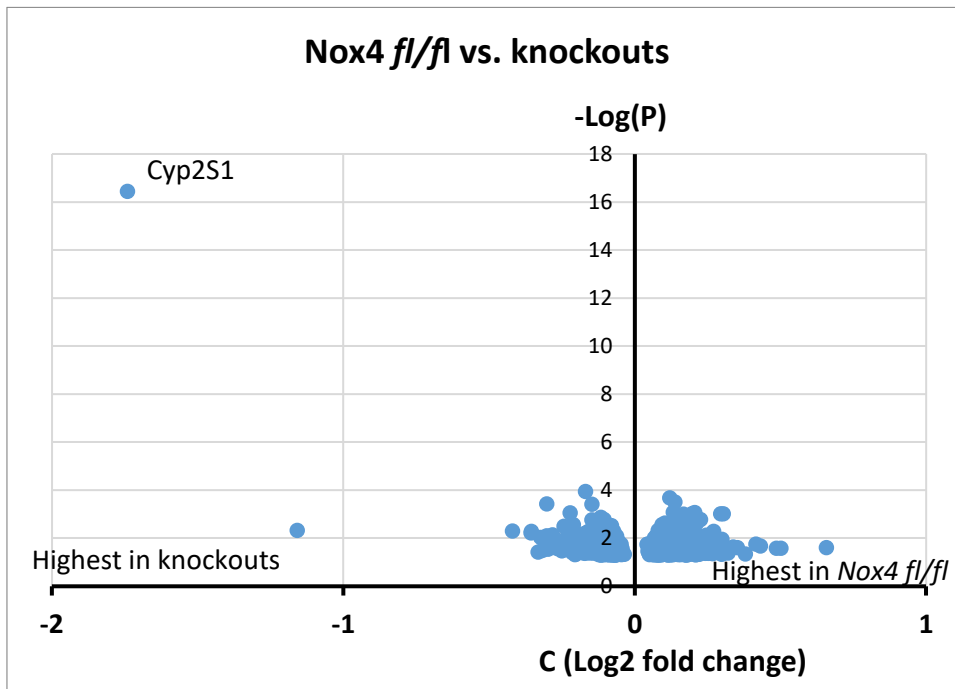

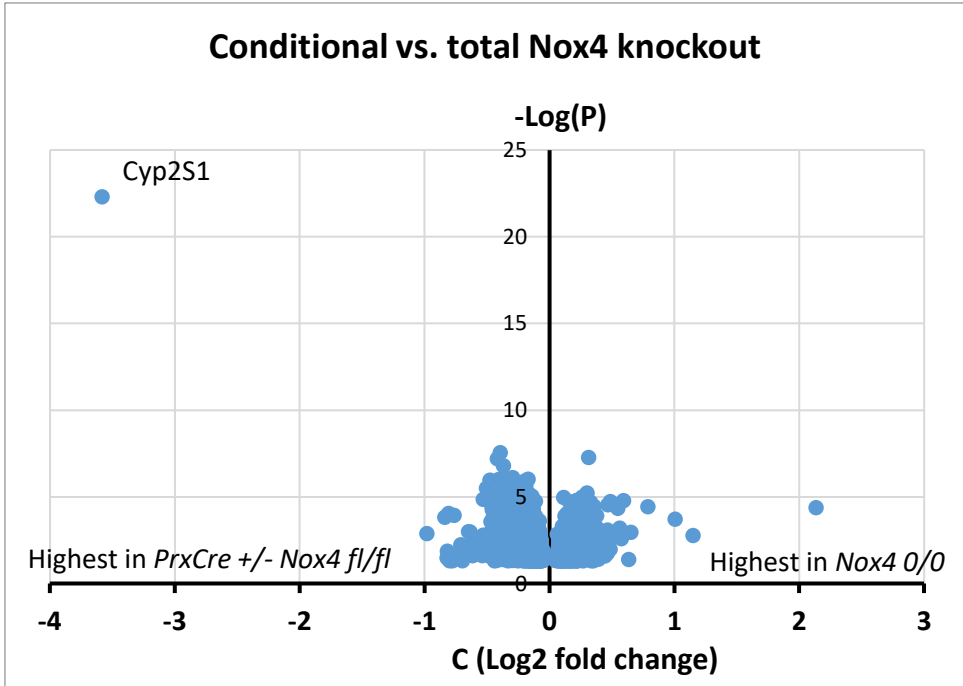

The following heatmap are for genes showing a significant (LSD  $P < 0.05$ ) difference in pairwise comparisons of any of the three genotypes with an absolute value of  $C > 0.3$ :

Genes with significant effect and min C of 0.3 for any comparison of two genotypes

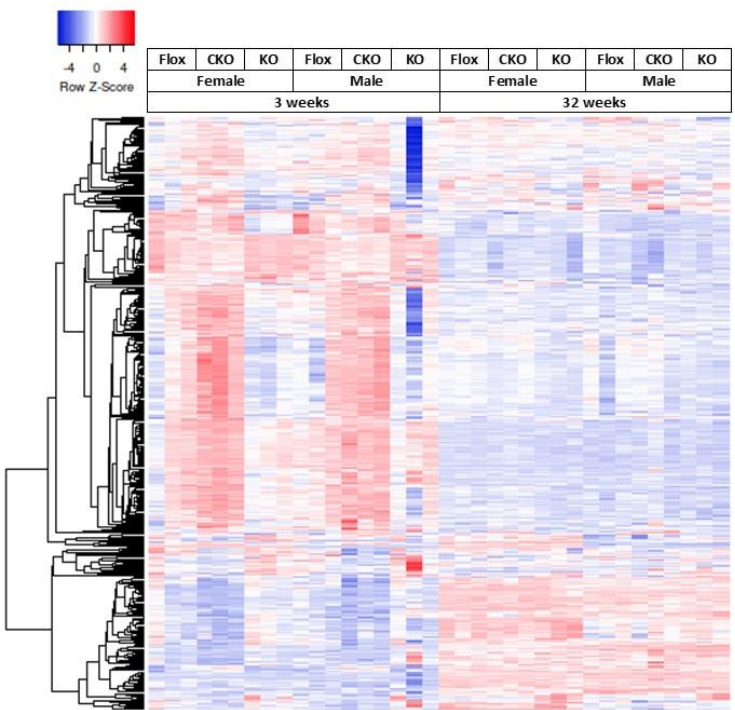

Genotype differences were most apparent at 3 weeks of age with expression in the conditional knockout genotype differing from expression in both the control floxed genotype and the whole body knockout genotype.

It should be noted that the analysis above included one sample of RNA pooled from male  $Nox4^{-/-}$  mice at 3 weeks of age resulting in only 406,684 total reads compared to the other samples with a minimum of 11,222,165 total reads. We further explored the data set when the sample with low total reads were eliminated.

A principal components analysis (PCA) is shown below:

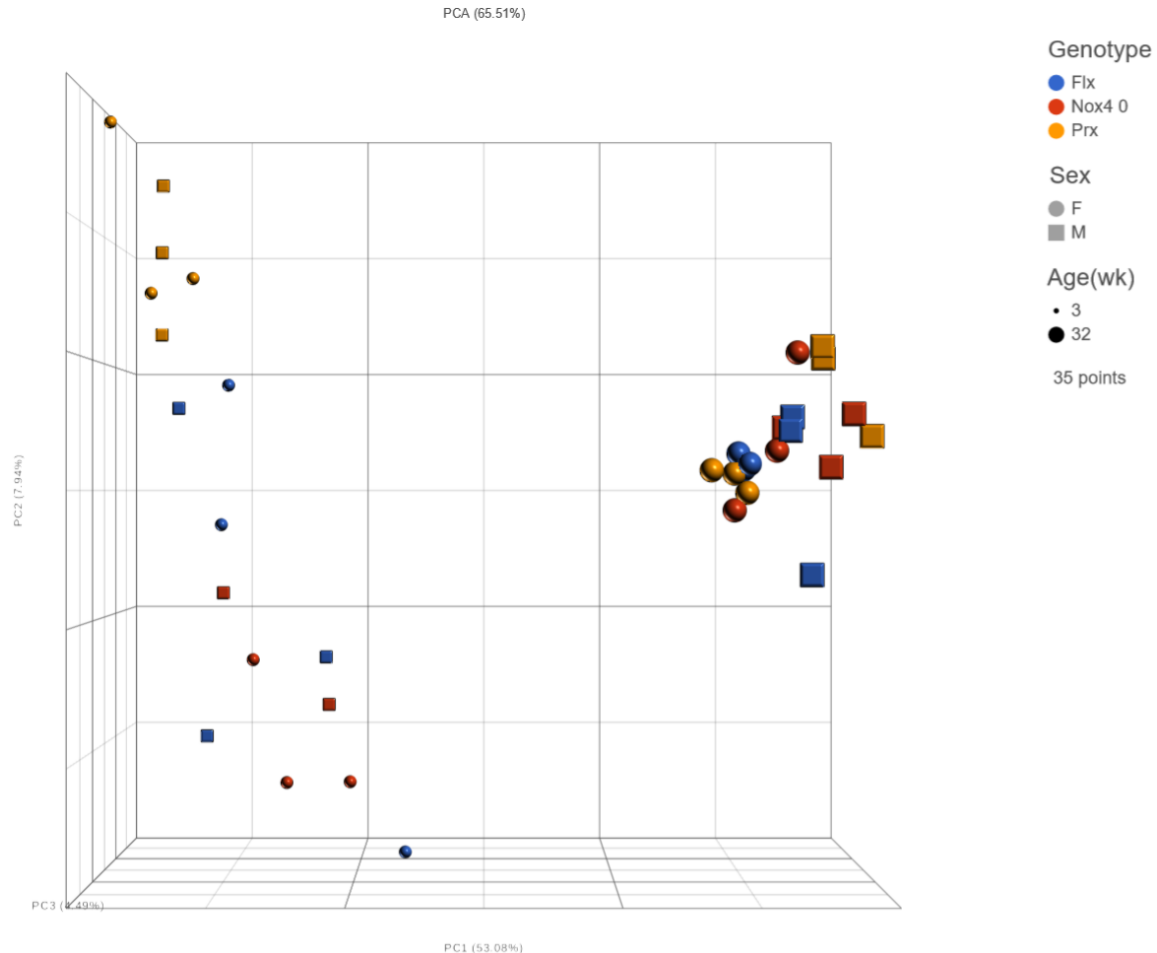

The first principal component separates all samples at 3 weeks of age from all samples at 32 weeks of age, underscoring that age is the most important variable in terms of sample distribution.

The second principal component appears to separate mice of the  $PrxCre^{+/-} Nox4^{fl/fl}$  genotype from the other two genotypes at 3 weeks of age.

Thus, the PCA analysis excluding the low count sample essentially shows the same general pattern as the ANOVA analyses including the low count sample.

Gene ontology enrichment analysis was conducted for the analysis of the top 500 most significant genes, i.e. with lowest P-values in the ANOVA analyses, for the main effects of age, sex and genotype. The analysis was conducted using the web-based Gene Ontology Resource (The Gene Ontology Consortium. 2019. The Gene Ontology Resource: 20 years and still GOing strong. *Nucleic Acids Research* 47:D330-D338).

The gene list for age was enriched in genes involved in e.g. blood coagulation, platelet biology, immune response, osteoblast differentiation and bone development.

The gene list for sex was enriched in genes involved in e.g. collagen fibril organization, extracellular matrix, cartilage development, immune response and the vasculature.

The gene list for genotype was enriched in genes involved in e.g. ribosome assembly, translation, mitochondrial biology and oxidative phosphorylation.
